# Supplementary material
Source: publisher site journal article supplement (https://www.spandidos-publications.com/6330/downloadSupplementary)
Supplement: Supplementary file 1 [file downloadSupplementary]

## Sheet: 工作表1
Table SIII. Raw analysis data of PRS analysis in psoriasis.
#CHROM	Position	SNP ID	REF	ALT	A1	OR	L95	U95	P-value
6	31225434	rs4997405	C	T	C	1.59258	1.48818	1.70431	3.00146e-41
6	29873418	rs9258981	A	G	G	1.43072	1.33821	1.52963	8.49022e-26
6	31381966	rs9266717	A	G	A	1.84687	1.64255	2.07662	1.11706e-24
6	30758971	rs3095341	T	C	T	1.53683	1.41527	1.66883	1.59267e-24
6	31336618	rs1634769	G	A	G	0.689352	0.638737	0.743978	1.16669e-21
6	31383735	rs3020583	G	A	G	1.38425	1.29358	1.48127	5.07909e-21
6	31137856	rs2074478	C	T	C	0.694999	0.643055	0.751139	4.30091e-20
6	30559068	rs2516647	T	G	T	1.34476	1.2571	1.43853	7.12036e-18
6	32409011	rs3763317	C	T	C	0.73706	0.687541	0.790146	8.13007e-18
6	31352114	rs2442726	G	T	G	1.33895	1.25159	1.4324	2.26835e-17
6	31810495	rs2227956	G	A	G	1.37094	1.27094	1.47882	3.24393e-16
6	29711825	rs1611364	T	C	T	0.598532	0.528482	0.677867	6.35986e-16
6	29971076	rs2735080	T	G	T	0.75724	0.707617	0.810343	8.8869e-16
6	32681899	rs9275109	G	T	G	0.642943	0.576298	0.717295	2.55258e-15
6	29548465	rs3094576	A	C	A	1.34622	1.24945	1.45048	5.65633e-15
6	29947284	rs2248162	T	C	T	1.91849	1.62225	2.26882	2.66447e-14
6	30397963	rs3130118	C	T	C	1.28782	1.20408	1.37739	1.66299e-13
5	159334291	rs1422876	C	T	C	0.776725	0.725278	0.831821	4.9633e-13
6	31115379	rs1042147	A	G	A	0.751899	0.693647	0.815044	4.18878e-12
6	31351843	rs9266071	C	T	C	1.2981	1.20566	1.39762	4.443e-12
6	32634853	rs9272232	C	T	C	1.25507	1.17389	1.34185	2.74827e-11
6	31034675	rs3869098	A	G	A	1.24853	1.16684	1.33595	1.28526e-10
6	32074545	rs3130286	T	C	T	0.779448	0.721846	0.841647	2.0048e-10
6	31642607	rs1077394	C	T	C	0.77854	0.719797	0.842077	3.99627e-10
6	30390003	rs3130140	T	C	T	0.799755	0.745184	0.858324	5.76567e-10
6	28647515	rs7748225	T	G	G	1.22711	1.14829	1.31134	1.51834e-09
6	29168669	rs3116854	G	A	A	1.22862	1.14923	1.3135	1.53428e-09
6	31417749	rs2848710	A	G	G	0.809072	0.755152	0.866841	1.73425e-09
6	28671070	rs10807040	A	G	A	0.655898	0.569476	0.755435	4.90027e-09
6	31053727	rs2523857	T	C	T	0.820147	0.76614	0.87796	1.1641e-08
6	32816119	rs2621326	G	A	G	0.821924	0.767653	0.880032	1.83684e-08
6	26923964	rs6456760	C	T	C	0.655209	0.564298	0.760768	2.89493e-08
6	32445540	rs2395182	G	T	G	0.736167	0.659122	0.822217	5.61883e-08
6	33103647	rs3128924	A	G	A	0.777544	0.709474	0.852145	7.33217e-08
6	30460659	rs2077314	A	C	A	1.39653	1.2338	1.58073	1.26694e-07
6	30237866	rs3094640	C	T	C	0.826674	0.770239	0.887244	1.31978e-07
6	31468270	rs2518028	T	C	T	0.754937	0.678669	0.839776	2.29719e-07
6	25629430	rs1980449	T	C	T	1.2168	1.12942	1.31094	2.45506e-07
6	32218487	rs436388	T	C	T	0.835298	0.779365	0.895245	3.59492e-07
6	27210744	rs858986	C	A	C	0.75759	0.680419	0.843514	4.09213e-07
6	28375144	rs6916243	T	C	T	1.84653	1.45182	2.34855	5.78092e-07
6	25464111	rs301398	T	C	T	0.718649	0.630356	0.819308	7.82335e-07
6	26456215	rs6456724	T	C	T	0.708411	0.617693	0.812452	8.19623e-07
6	31873017	rs614008	C	T	C	0.818943	0.756031	0.88709	9.69506e-07
6	31489608	rs2904782	T	C	T	0.800879	0.73227	0.875917	1.17819e-06
6	32481746	rs9269202	T	C	T	0.839383	0.781814	0.901191	1.36588e-06
6	25725605	rs9393657	A	C	A	0.665229	0.562995	0.786027	1.68451e-06
1	67134418	rs12069782	C	T	C	1.31432	1.17093	1.47526	3.53053e-06
6	27587347	rs4713113	A	G	G	1.17014	1.0948	1.25067	3.70741e-06
6	25638241	rs6456686	C	T	T	0.851024	0.794541	0.911522	4.14712e-06
6	32245433	rs454748	G	A	G	0.846321	0.788028	0.908927	4.59461e-06
11	110138769	rs657175	G	T	G	1.1898	1.10213	1.28444	8.58333e-06
4	48481399	rs6447640	A	G	A	0.858059	0.800293	0.919994	1.6697e-05
14	81987574	rs1953844	G	A	G	1.31593	1.16003	1.49278	1.97911e-05
17	80191657	rs8068433	C	T	T	0.860763	0.803412	0.922208	2.0265e-05
6	29384854	rs3117443	G	A	G	0.863165	0.806518	0.92379	2.14896e-05
6	32418694	rs4412247	A	G	A	1.62733	1.29907	2.03855	2.27349e-05
6	33028518	rs6913838	T	C	C	0.86546	0.809218	0.925611	2.50047e-05
4	148573362	rs977064	G	A	G	1.5841	1.27869	1.96246	2.55785e-05
5	29339285	rs7710874	T	C	C	1.1746	1.08947	1.26638	2.76188e-05
1	204146349	rs940652	C	T	C	0.728025	0.627268	0.844968	2.96126e-05
3	112612501	rs1552707	T	C	T	1.65303	1.30553	2.09303	2.99137e-05
6	26464561	rs6916321	A	G	A	0.782494	0.697095	0.878354	3.18583e-05
15	99484874	rs2902137	A	G	G	1.16062	1.08195	1.24501	3.1888e-05
9	97976835	rs10984606	T	G	G	0.852012	0.790023	0.918866	3.2467e-05
14	57509379	rs268823	G	A	G	1.16354	1.083	1.25007	3.49533e-05
9	108438170	rs632905	T	C	T	1.2731	1.13421	1.42899	4.19186e-05
1	67176540	rs7532161	A	G	A	1.15652	1.07837	1.24033	4.62592e-05
17	27686656	rs12450783	C	T	T	1.14861	1.07404	1.22836	5.21883e-05
6	26871937	rs932626	T	G	T	0.863138	0.802583	0.928262	7.31585e-05
18	27247992	rs2247559	C	T	T	0.86116	0.799779	0.927251	7.43326e-05
2	234631445	rs6431281	C	T	C	1.49179	1.22215	1.82092	8.41802e-05
14	81984656	rs1198017	G	A	G	0.83831	0.767412	0.915759	9.15733e-05
8	18159572	rs7465483	G	A	G	1.15014	1.07146	1.23459	0.000109304
5	76634246	rs2432192	A	G	G	0.875064	0.817578	0.936593	0.000118397
18	29029894	rs12956304	T	C	T	1.1475	1.06973	1.23092	0.000121815
6	119893935	rs496149	A	G	A	1.24231	1.11194	1.38795	0.00012512
17	40790746	rs12949968	T	C	T	0.866293	0.804865	0.932409	0.000130818
7	105450817	rs6951184	A	G	A	1.29026	1.1317	1.47104	0.000139428
1	37309488	rs11264018	T	C	T	0.848473	0.779215	0.923888	0.000155498
13	23007123	rs9510518	C	T	C	0.86215	0.798346	0.931053	0.000156169
13	78700305	rs2027037	C	T	C	0.873022	0.813423	0.936988	0.000167201
7	26655596	rs212837	T	C	T	1.14205	1.06555	1.22405	0.00017357
3	46556887	rs13353497	G	T	G	1.16528	1.07582	1.26218	0.000174612
15	96828198	rs7179800	G	A	G	1.16879	1.07711	1.26828	0.000182554
17	79989571	rs7223264	T	C	T	0.814987	0.731777	0.907658	0.000196698
3	29318885	rs10865825	G	T	G	1.26845	1.11867	1.43828	0.00020796
6	106120159	rs548234	C	T	C	1.15786	1.07148	1.25119	0.000211035
1	202805378	rs4950919	T	C	T	0.880348	0.822796	0.941926	0.000220423
8	36267880	rs6468357	T	C	T	0.86439	0.800025	0.933933	0.000223205
9	80080715	rs1410500	G	A	G	1.25724	1.11321	1.4199	0.000226399
17	78303589	rs4404140	G	A	G	0.834676	0.758216	0.918845	0.000227262
5	36031016	rs2453298	A	G	A	0.753618	0.648326	0.876011	0.00022961
16	87654712	rs4843656	T	C	T	0.85971	0.793275	0.931709	0.000229809
5	141077901	rs31797	C	T	C	0.868714	0.806034	0.936268	0.000230067
6	36228385	rs7747793	A	G	A	0.654354	0.521854	0.820495	0.000238966
3	179429691	rs7625375	G	T	G	0.868719	0.805877	0.936463	0.000239317
1	91359068	rs282053	C	A	C	0.834813	0.757984	0.919429	0.000247051
3	172342068	rs620798	T	C	T	1.19756	1.08743	1.31886	0.00024952
4	105049790	rs2130691	G	A	G	1.53334	1.21972	1.92759	0.000251062
2	35181141	rs10204586	A	C	A	1.14073	1.06286	1.2243	0.000262261
2	138538467	rs6745806	A	G	A	4.0665	1.91179	8.6497	0.000269658
8	96601329	rs2437778	C	T	C	0.863407	0.797729	0.934492	0.000274362
9	1679714	rs10124068	G	A	G	1.13869	1.06173	1.22122	0.00027501
18	67364182	rs7244447	C	A	C	1.17453	1.07677	1.28117	0.000285598
10	117054893	rs7089319	T	C	T	0.832637	0.753934	0.919557	0.000299944
10	31995339	rs806814	C	T	C	1.75574	1.29212	2.38571	0.000320385
2	62387814	rs11125918	A	C	A	1.13776	1.06052	1.22064	0.000320843
3	19938236	rs2929345	G	A	A	0.872669	0.810083	0.94009	0.000334477
9	70569084	rs10868853	C	T	C	0.602912	0.45727	0.794943	0.000334931
10	4792364	rs9423376	T	C	C	1.13672	1.05982	1.2192	0.000336365
5	13871205	rs1445809	C	T	C	1.21769	1.09332	1.35622	0.000339796
12	11629301	rs11054393	T	C	C	0.880784	0.821627	0.9442	0.000345438
9	25648201	rs7036161	A	G	A	1.18301	1.07875	1.29735	0.000356489
12	72249243	rs10879382	C	T	T	1.12877	1.05601	1.20654	0.000366579
11	23984881	rs2139513	A	G	A	4.21144	1.90549	9.30795	0.00038034
7	139670344	rs9769817	T	G	T	1.64559	1.24986	2.16662	0.000386505
10	114844585	rs2181563	T	C	C	1.13804	1.05956	1.22234	0.000389637
17	11508012	rs3095686	G	A	G	1.33696	1.13848	1.57004	0.00039747
12	34391044	rs7398476	T	C	T	2.19602	1.4191	3.39828	0.00041367
19	34968249	rs2546041	C	T	T	1.1331	1.05716	1.2145	0.000414978
1	85385625	rs761602	C	T	C	1.22853	1.09578	1.37737	0.000419374
4	48821963	rs13109500	C	T	C	0.885152	0.827139	0.947234	0.000419746
9	9164268	rs1445207	T	C	T	1.14647	1.06261	1.23695	0.000420414
9	76827676	rs11145087	C	T	C	1.13692	1.05851	1.22115	0.000432615
11	29088730	rs2172226	G	A	G	1.74807	1.28077	2.38587	0.000432798
5	40039162	rs1395153	T	C	T	1.12805	1.05484	1.20635	0.000432965
8	11763693	rs2686207	T	C	T	1.14912	1.06349	1.24164	0.000434964
6	33170721	rs2855440	T	C	T	1.35284	1.14281	1.60147	0.000446908
8	83187531	rs1521829	C	T	C	1.19138	1.08024	1.31395	0.00045707
19	6298367	rs4807860	C	A	C	1.14231	1.06037	1.23059	0.000459634
16	49210578	rs4785164	G	A	G	0.658637	0.520901	0.832794	0.000485763
14	65784332	rs28470717	T	C	T	1.13502	1.05705	1.21874	0.000486901
6	425573	rs6916402	C	T	T	1.13101	1.05511	1.21237	0.000513575
3	13870991	rs12635960	T	C	T	0.745849	0.632015	0.880185	0.000519747
5	159457111	rs4921502	G	A	G	1.13024	1.05456	1.21136	0.000535947
20	47912788	rs2426035	T	C	T	1.22519	1.0916	1.37513	0.000565021
1	242991309	rs6673892	C	T	C	1.13158	1.05477	1.21398	0.000567479
6	151548932	rs6557146	A	G	A	1.88873	1.31405	2.71474	0.000591627
5	140951752	rs246039	G	A	G	0.881624	0.820433	0.947378	0.000597256
9	7068436	rs10815511	T	C	T	1.14087	1.05812	1.23009	0.000602738
11	20623214	rs1894163	T	C	T	1.18416	1.07507	1.30433	0.000608619
11	81018333	rs1874796	C	T	T	1.13225	1.05462	1.21558	0.000608784
12	14974004	rs10505783	A	C	A	1.16628	1.06798	1.27362	0.00061693
5	123715932	rs3886629	G	A	G	0.852258	0.777537	0.934159	0.000638331
1	118215823	rs10494207	G	A	G	0.874395	0.80953	0.944457	0.000642397
5	167536035	rs1529694	G	A	G	1.15863	1.06467	1.26088	0.000644294
4	162498457	rs4405973	G	A	G	0.878363	0.815277	0.94633	0.000648164
11	134006209	rs608671	C	T	T	1.12487	1.0513	1.20359	0.000650887
7	150956248	rs882156	T	C	T	0.81888	0.729948	0.918647	0.000657825
8	10285654	rs2952251	A	G	A	1.16541	1.06711	1.27276	0.00066249
8	62131511	rs4237050	C	T	C	1.13464	1.055	1.22028	0.000668506
6	61703641	rs1204139	A	C	A	0.875651	0.811156	0.945275	0.000669613
3	71935596	rs6549420	A	G	A	1.12613	1.05163	1.2059	0.000669879
1	246603133	rs6426312	A	G	A	1.23476	1.0934	1.3944	0.00067535
8	42076400	rs6990638	A	G	A	0.882031	0.820436	0.948251	0.000677341
14	104666850	rs10138816	T	C	C	0.88848	0.829885	0.951212	0.000681551
7	21213461	rs1406801	T	G	G	0.886936	0.82748	0.950664	0.000701209
1	53128032	rs946591	A	G	A	1.13153	1.0534	1.21545	0.00071127
16	82572095	rs28378230	A	G	A	0.884311	0.823528	0.949581	0.00071476
22	30854677	rs5749176	A	G	A	1.13158	1.05331	1.21567	0.000724522
11	47945615	rs1227998	T	C	T	1.23297	1.09198	1.39218	0.000724663
19	32615045	rs377044	C	T	T	1.13307	1.05384	1.21826	0.00073023
8	11835869	rs6990033	G	T	G	1.32539	1.12544	1.56086	0.0007346
3	135612930	rs2400566	G	T	G	3.60444	1.70887	7.60269	0.000759574
18	47403287	rs977160	T	C	T	1.25275	1.09869	1.42841	0.000763539
4	60065572	rs533304	C	T	C	0.812083	0.719361	0.916757	0.000765432
10	35718851	rs602658	G	A	G	0.727383	0.604211	0.875665	0.000772157
20	4324221	rs4813686	C	A	C	1.15948	1.06365	1.26393	0.000773439
2	45065941	rs2959254	A	G	G	1.12483	1.05018	1.20478	0.000786486
20	39676198	rs2754218	G	T	G	1.12239	1.04916	1.20072	0.000796239
3	162730126	rs9867696	G	A	G	0.880004	0.816664	0.948257	0.000796599
20	53454423	rs6068549	A	G	A	1.12593	1.05052	1.20675	0.000798372
2	124173498	rs1821953	C	T	T	1.12563	1.05035	1.20631	0.000805912
4	180675745	rs2546249	T	C	T	1.14704	1.05852	1.24296	0.000814411
22	45943167	rs10448588	C	T	T	0.887994	0.828337	0.951947	0.000814424
2	189000947	rs1040187	G	A	G	1.24581	1.09537	1.41692	0.000816162
11	111405360	rs10891261	C	T	T	0.891315	0.833229	0.953451	0.000818858
6	61151081	rs4039839	A	G	A	0.8798	0.816194	0.948363	0.000823793
22	16583531	rs4819768	C	A	C	1.67905	1.23866	2.27602	0.000840953
6	28916166	rs3131098	T	C	T	1.12069	1.04799	1.19844	0.000869958
22	22924624	rs409751	C	T	C	1.14224	1.05621	1.23528	0.000872393
6	32323150	rs4279480	G	T	G	0.877341	0.812279	0.947614	0.000872554
1	67063406	rs2815347	G	A	G	1.27902	1.10622	1.47882	0.000890209
12	29235177	rs2113534	G	A	G	0.872875	0.805515	0.945869	0.000906329
21	36884117	rs4817826	C	T	C	1.15577	1.06101	1.259	0.000910626
3	117372141	rs1913230	C	A	C	0.891345	0.832747	0.954066	0.000915579
6	5832350	rs942112	G	A	G	0.86058	0.787447	0.940504	0.000920806
2	242034729	rs4973680	T	C	T	1.17256	1.06686	1.28872	0.000956869
10	122216876	rs10444046	C	A	C	2.72398	1.50177	4.94088	0.000972187
1	206465765	rs9429933	A	G	A	0.253171	0.11185	0.573048	0.000981296
19	20662960	rs274797	A	G	A	1.12875	1.05029	1.21307	0.000984301
9	108766967	rs7872642	T	C	T	0.85258	0.775142	0.937753	0.00102767
7	44559607	rs217389	A	G	G	1.12334	1.04793	1.20418	0.00103671
12	32186957	rs2650122	T	C	T	1.12338	1.04793	1.20426	0.00103892
7	153412736	rs6464331	A	G	A	0.81111	0.715697	0.919243	0.00104276
7	69532048	rs41867	A	G	A	1.41805	1.15083	1.74732	0.0010431
2	170101062	rs10193093	G	A	G	1.18838	1.07168	1.31779	0.00106502
9	7711440	rs328864	G	A	G	0.89012	0.830162	0.954408	0.00106981
8	55108606	rs9694358	A	G	A	1.34002	1.12447	1.59688	0.00107123
18	13431323	rs12965816	T	C	T	1.13355	1.05148	1.22202	0.00107855
1	65973025	rs2489914	A	G	A	3.40398	1.63121	7.10336	0.00109966
11	134893832	rs1382498	T	C	T	1.12465	1.04804	1.20685	0.00110029
9	8189112	rs10511488	G	A	G	1.12237	1.04708	1.20308	0.00111963
3	75267164	rs9811814	A	G	A	1.14295	1.0546	1.2387	0.00113303
1	242946546	rs2502324	G	A	G	1.23196	1.08646	1.39695	0.00114162
14	97043001	rs1955581	C	T	C	4.90851	1.88137	12.8063	0.00114735
7	28426099	rs174023	G	A	G	1.57943	1.19876	2.08099	0.0011606
12	103978878	rs10861152	A	G	A	0.894112	0.8357	0.956607	0.00116663
5	170620649	rs2202437	G	A	G	1.24116	1.08939	1.41408	0.00116801
12	84725290	rs4445681	A	G	A	1.12298	1.04701	1.20446	0.00117249
17	76265848	rs71382201	A	G	G	1.1213	1.04639	1.20157	0.00117362
14	72944816	rs2806045	T	C	T	0.851864	0.773228	0.938498	0.00117667
1	7495204	rs1750848	G	A	G	0.849421	0.769571	0.937556	0.00119495
10	20942728	rs10764295	T	C	T	1.12224	1.0466	1.20334	0.00119785
13	93719712	rs4771879	T	C	T	1.16606	1.06254	1.27967	0.00120027
9	19926440	rs2275858	C	T	C	0.881616	0.816793	0.951584	0.00122254
10	15384398	rs10737098	T	C	T	1.29744	1.10793	1.51937	0.00122872
15	27174705	rs6606882	A	G	G	0.891615	0.831687	0.955862	0.00123124
10	63998614	rs1610103	T	C	T	4.73858	1.84368	12.1789	0.00123718
1	168526418	rs10737543	T	C	T	1.15498	1.05825	1.26055	0.00124424
1	82333337	rs786074	A	G	A	0.867825	0.796252	0.945831	0.00124619
3	167028770	rs1356767	C	T	C	1.28011	1.1018	1.48729	0.00125279
17	55079828	rs2628304	G	A	G	0.83515	0.748547	0.931773	0.0012594
3	36924576	rs6806158	T	C	C	1.11766	1.04456	1.19588	0.00126801
4	74883020	rs12386416	T	C	C	1.11615	1.04387	1.19344	0.00129519
1	107720540	rs7523636	G	T	G	4.13204	1.74024	9.81118	0.00130145
14	62936841	rs2356098	C	T	C	0.888433	0.826602	0.954888	0.00130809
10	116185228	rs4751580	A	C	A	1.22941	1.08391	1.39443	0.00130967
18	45622439	rs7232775	C	T	C	1.16705	1.06201	1.28248	0.00132667
8	142659963	rs4736361	A	G	A	0.892028	0.831897	0.956505	0.00133268
10	19580349	rs7095285	G	A	A	0.894936	0.836239	0.957753	0.00134087
3	53739138	rs2680652	A	C	A	0.807234	0.708181	0.920142	0.00134599
6	9387797	rs1206908	A	G	A	0.871223	0.800663	0.948002	0.00137831
6	32985934	rs206776	T	C	T	1.11529	1.04306	1.19251	0.00140224
5	173347322	rs4868259	T	C	T	1.17073	1.06279	1.28963	0.00140386
7	44098138	rs4394305	A	G	A	1.13552	1.05024	1.22772	0.00141977
4	77145674	rs7668440	C	T	C	1.18679	1.06811	1.31865	0.00144393
16	83053382	rs12103074	A	G	A	1.25431	1.09087	1.44224	0.00146789
8	105024961	rs3107546	A	G	A	0.80937	0.710444	0.92207	0.00147392
14	99879076	rs976451	C	A	C	0.847558	0.765349	0.938597	0.00148653
13	70245358	rs9542241	G	T	T	1.11599	1.04289	1.19421	0.00149824
20	11623597	rs6040799	A	G	A	0.876398	0.807829	0.950787	0.00150345
8	14154770	rs3888260	A	G	A	0.880527	0.81399	0.952502	0.00150425
5	5506197	rs2928224	T	C	T	0.874004	0.804145	0.949931	0.00153236
11	65896875	rs637571	T	C	T	1.13773	1.05039	1.23233	0.00154432
11	56799129	rs528894	G	T	G	0.888229	0.825368	0.955879	0.00155145
5	145399693	rs711169	C	T	C	1.14665	1.05346	1.24807	0.00155436
14	41225810	rs6572078	G	A	G	1.11939	1.04384	1.20041	0.00155868
1	6724404	rs277680	C	T	C	0.852514	0.772249	0.941122	0.00156281
3	187625490	rs1823707	G	A	G	1.12331	1.04519	1.20727	0.00156869
5	78982348	rs163130	T	C	T	1.18153	1.06542	1.31028	0.00157411
6	162903810	rs915013	C	T	C	0.893325	0.832921	0.95811	0.00158889
1	236339472	rs1975519	G	T	G	0.89516	0.835681	0.958872	0.00159313
7	35898987	rs2392388	C	T	C	1.52342	1.1729	1.97869	0.00160295
14	24636660	rs10138102	T	C	T	0.799911	0.696308	0.918929	0.00160711
9	130734494	rs2313568	T	C	T	1.11952	1.04362	1.20093	0.00162095
20	767191	rs6054627	A	G	A	1.1317	1.04788	1.22222	0.00162634
16	67592291	rs8055358	G	A	G	3.58561	1.6184	7.94405	0.00165441
10	90265902	rs12219014	T	C	T	0.896216	0.837079	0.959531	0.00165482
10	93763464	rs10450368	A	G	A	1.28215	1.09823	1.49688	0.00165512
1	55058928	rs565436	G	A	G	0.822642	0.728396	0.929082	0.00166181
6	149266228	rs6908247	G	A	G	0.882893	0.816951	0.954158	0.001662
1	163867298	rs781936	A	C	A	1.19049	1.06789	1.32716	0.00166287
6	64880954	rs7774169	A	G	A	0.855141	0.775673	0.94275	0.00166292
13	60725000	rs1041329	G	A	A	1.12771	1.04628	1.21548	0.00167193
1	101243783	rs7522573	G	A	G	0.414402	0.239222	0.717865	0.00167575
2	119651775	rs1521911	C	T	C	1.16292	1.05843	1.27772	0.00167639
6	32836637	rs241427	A	G	A	1.12243	1.04439	1.20629	0.00168165
2	22945667	rs4414642	A	G	G	0.893346	0.832632	0.958488	0.00168587
2	40719094	rs11124758	A	G	A	0.627951	0.469638	0.839629	0.00169362
7	23762384	rs10278268	A	G	A	1.14756	1.05304	1.25058	0.00169972
2	28697469	rs11887648	C	T	C	0.865306	0.79055	0.947132	0.00169984
7	20670766	rs7455102	A	G	A	1.42384	1.1418	1.77555	0.00170524
10	32408728	rs7919041	T	C	C	1.11507	1.04171	1.19358	0.00170678
3	187320456	rs4686459	G	A	G	1.27429	1.09516	1.48273	0.001713
18	4734814	rs4239323	G	A	G	3.04151	1.51712	6.09757	0.00172143
17	40059695	rs7502912	A	G	G	0.893719	0.833011	0.958852	0.00174396
8	9552472	rs6992432	C	T	C	1.18951	1.06694	1.32616	0.00176181
1	234450044	rs1619856	T	C	T	1.11306	1.04079	1.19034	0.00176383
13	35879789	rs4941823	A	G	A	1.11603	1.04178	1.19556	0.00177571
1	4955784	rs6656223	G	A	G	0.894763	0.834464	0.959419	0.00178562
6	24476325	rs760904	G	A	A	0.894972	0.834776	0.959509	0.00178756
12	66536020	rs7131852	C	T	C	1.11185	1.04024	1.1884	0.00180021
18	38189479	rs4294881	G	T	G	0.761225	0.641273	0.903614	0.00181809
9	116792231	rs2028495	A	G	A	1.60849	1.19301	2.16867	0.00182379
4	48220143	rs16851721	T	C	T	1.11899	1.04257	1.20101	0.00183841
1	79965337	rs299801	A	G	A	1.16523	1.05827	1.283	0.00185324
7	52287199	rs10256434	T	C	T	0.769854	0.652877	0.90779	0.0018682
2	123648493	rs1398931	A	G	A	0.899287	0.841101	0.961499	0.00186848
14	81110082	rs7160596	G	A	A	1.11801	1.04208	1.19947	0.00187991
11	42124658	rs10768782	A	G	A	0.89691	0.837429	0.960617	0.00188617
1	44530860	rs270745	A	G	A	1.16949	1.05952	1.29087	0.00188673
2	32789832	rs220657	G	A	G	1.12008	1.04275	1.20316	0.00189214
17	35084409	rs797992	T	C	T	0.895329	0.834989	0.960029	0.00189748
1	248179535	rs7537031	C	A	C	1.1196	1.04252	1.20238	0.00190879
1	61999215	rs944705	C	T	T	0.898883	0.840365	0.961476	0.00191069
2	138532231	rs4954934	A	G	A	3.52592	1.59067	7.81566	0.00191665
5	176489248	rs2277068	T	C	T	0.887051	0.822373	0.956815	0.0019169
1	237197145	rs7544666	G	A	G	0.897662	0.838421	0.961088	0.00193954
15	65048088	rs10851744	C	T	C	0.518512	0.342276	0.78549	0.00193961
9	103311132	rs303617	T	G	T	0.819105	0.721969	0.92931	0.00194645
7	18029184	rs6461371	G	A	G	1.123	1.04352	1.20852	0.00195179
10	132200486	rs2247705	G	A	G	1.30451	1.10239	1.54368	0.00196849
13	42414410	rs7328203	T	G	T	1.13051	1.04599	1.22186	0.00197505
13	39269477	rs2875295	A	C	A	0.826198	0.732072	0.932426	0.00197686
6	8587187	rs3005159	A	C	A	0.88337	0.81662	0.955575	0.00197786
8	108821685	rs4487727	A	G	A	1.14513	1.05075	1.248	0.00201618
18	9086630	rs1784772	T	C	T	0.849211	0.765523	0.942048	0.00201673
15	53364648	rs272801	A	C	A	1.11897	1.04188	1.20176	0.00202576
12	1099557	rs10848437	A	G	A	1.1954	1.06726	1.33892	0.00203471
3	176611655	rs55633740	C	A	A	1.11095	1.03911	1.18775	0.00203822
2	151339819	rs4664021	C	T	C	0.895319	0.834504	0.960566	0.00206326
9	75878906	rs4487843	T	C	T	0.616796	0.453453	0.83898	0.00208061
8	40693858	rs58667497	G	A	G	1.1191	1.0417	1.20225	0.00209015
14	82404951	rs1152402	A	G	A	1.20417	1.06974	1.3555	0.00209748
13	74697949	rs6562849	T	C	T	0.725744	0.59165	0.890231	0.00210119
12	16145468	rs1614728	G	T	T	1.11504	1.04028	1.19517	0.002102
12	71743884	rs10879325	A	G	A	1.1139	1.03989	1.19319	0.00210533
10	11302488	rs2948706	G	A	G	0.716232	0.578921	0.88611	0.00211614
19	44827846	rs7343130	A	G	G	1.11664	1.04065	1.19818	0.00215484
6	88340988	rs6913188	T	C	T	0.83276	0.740824	0.936106	0.00216812
10	126563407	rs7911240	A	G	A	1.13359	1.04624	1.22825	0.00217913
4	180715287	rs1363207	C	T	C	0.895137	0.833905	0.960866	0.00218259
10	73909432	rs2227551	G	T	T	1.11525	1.04004	1.19589	0.00219785
11	1649994	rs11038129	G	A	G	1.52164	1.16298	1.99091	0.00220681
14	68506829	rs757369	A	G	G	1.10975	1.03816	1.18627	0.00220709
6	25787589	rs2096386	G	A	A	0.884155	0.817118	0.956691	0.00220956
10	65439269	rs12774726	C	T	T	1.11561	1.0401	1.19661	0.00221684
3	195461139	rs823531	T	C	T	0.861467	0.782971	0.947831	0.00221999
18	78087261	rs4381678	A	C	A	1.11417	1.0396	1.19409	0.00222194
4	23855664	rs10002521	C	T	C	0.89111	0.827655	0.959431	0.00222246
11	37741971	rs2860926	A	C	A	1.19483	1.06601	1.33921	0.00222631
19	52580380	rs59524734	G	A	A	0.898606	0.839059	0.962378	0.00224176
18	61738571	rs6567240	C	A	A	0.899392	0.840263	0.962682	0.00224241
10	87087015	rs7068848	G	T	G	1.14594	1.05002	1.25063	0.00225688
13	75503772	rs4242961	A	G	A	1.11915	1.04112	1.20303	0.00226696
16	81631797	rs6564905	T	C	T	0.875413	0.803734	0.953484	0.00226706
16	57137485	rs2305691	C	T	C	1.12618	1.04344	1.21547	0.00227088
1	63314456	rs6665922	C	T	C	0.895162	0.833711	0.961143	0.00227165
3	59750573	rs812965	T	C	T	0.75801	0.634413	0.905686	0.00228261
1	199031598	rs6427756	A	G	A	0.85987	0.780292	0.947563	0.0023112
13	22211887	rs7331655	T	C	T	0.896345	0.835413	0.961722	0.00231464
21	22565435	rs2827590	A	G	G	0.890784	0.826893	0.959613	0.00232218
13	41550953	rs1179960	A	G	A	1.20762	1.06946	1.36364	0.00234064
1	111299322	rs4376736	T	C	T	2.25206	1.33467	3.80002	0.00235413
5	74259623	rs176764	G	A	A	0.896576	0.835649	0.961946	0.0023621
11	18717624	rs4264133	T	C	T	1.26253	1.08637	1.46725	0.00236266
11	97550607	rs2852900	T	G	T	0.853425	0.770531	0.945238	0.00236374
4	156550575	rs2177063	T	G	T	0.900599	0.84181	0.963493	0.00236791
10	94547981	rs1977288	C	T	C	1.1358	1.04625	1.23301	0.00237283
8	82231360	rs6999711	T	G	T	1.13702	1.04664	1.23521	0.00237622
4	124804199	rs724749	A	G	A	1.11555	1.0395	1.19715	0.00240091
6	146612179	rs7769729	T	C	T	1.13846	1.04697	1.23796	0.00241586
11	68318300	rs97411	T	C	T	1.13257	1.04503	1.22746	0.00242163
10	66554801	rs2660026	A	C	A	0.378646	0.202071	0.70952	0.00243746
3	4936735	rs6442920	A	G	A	1.14746	1.04979	1.25421	0.00244173
3	59645781	rs7631609	T	C	C	0.898653	0.838625	0.962978	0.00244963
4	139767297	rs6818154	C	T	C	0.836407	0.745023	0.939	0.00247678
22	50583688	rs963980	C	A	C	1.46377	1.14365	1.87348	0.00247809
9	26121105	rs6475884	A	C	C	1.11124	1.03785	1.18982	0.00248177
4	58291022	rs2553294	A	G	A	1.15882	1.05321	1.27501	0.00249966
17	51964689	rs203026	A	G	A	1.24851	1.08111	1.44183	0.00251316
1	230842017	rs1202551	G	A	G	0.77695	0.659615	0.915157	0.00251651
1	20641518	rs3102071	A	G	A	0.873984	0.800785	0.953873	0.00254313
5	98084245	rs173977	A	G	A	1.11188	1.03785	1.19118	0.00255481
22	27667767	rs134079	C	A	C	0.832833	0.739442	0.938018	0.002575
16	67370471	rs9924505	A	G	A	3.39386	1.53304	7.51336	0.00258101
10	79403142	rs7902656	G	A	G	0.801981	0.694757	0.925753	0.00258255
14	56995089	rs1570526	G	A	G	1.78965	1.22556	2.61338	0.00258794
2	32408501	rs176400	A	G	A	1.12429	1.04168	1.21346	0.0026252
7	115377913	rs2056734	T	C	T	1.11773	1.0395	1.20184	0.0026437
6	35456411	rs3800377	A	G	A	1.10855	1.03647	1.18563	0.00266084
19	28082676	rs8110228	A	G	A	1.13948	1.04633	1.24092	0.00269315
5	108488439	rs6866420	G	A	G	1.13268	1.04412	1.22876	0.00270665
1	79145869	rs7537452	G	A	G	1.12183	1.04062	1.20938	0.00271303
1	241783464	rs953597	A	C	C	0.902185	0.843433	0.965029	0.00273514
6	160900103	rs1937467	A	G	G	1.10829	1.03618	1.18542	0.00273946
5	135662556	rs6877267	A	G	G	1.10958	1.0366	1.1877	0.0027415
2	18678270	rs11096552	G	A	G	0.815298	0.713313	0.931864	0.00274471
5	51863749	rs3111066	G	A	G	1.17749	1.05802	1.31044	0.00275963
3	134257801	rs7616326	T	C	T	1.1124	1.03745	1.19277	0.00276408
22	23758115	rs5760000	A	G	A	1.13775	1.04549	1.23815	0.00278083
6	31138114	rs2233952	A	G	A	0.777255	0.658942	0.916811	0.00278215
10	71887908	rs10762487	C	T	C	0.763868	0.640241	0.911367	0.00278715
14	39719682	rs1956150	C	A	C	1.15876	1.05206	1.27627	0.0027924
13	61014715	rs7995967	C	T	C	1.2572	1.08196	1.46081	0.00280265
15	60062212	rs7173749	A	C	A	1.12588	1.04164	1.21694	0.0028066
14	33451068	rs7152199	G	A	G	0.840157	0.749442	0.941852	0.00281198
6	25684051	rs4712955	A	G	G	0.897279	0.835633	0.963473	0.00283923
6	51393184	rs2504707	T	C	T	1.1137	1.03761	1.19536	0.002857
12	127734208	rs12580139	A	G	G	1.10763	1.03562	1.18464	0.00287617
2	201835323	rs7600060	G	A	G	0.895255	0.832425	0.962827	0.00287958
7	132841590	rs4731907	T	C	C	1.10788	1.0357	1.1851	0.00287975
8	47832406	rs6473790	T	C	T	0.786592	0.67168	0.921164	0.00289118
5	72031839	rs1217756	G	A	G	0.894198	0.830766	0.962472	0.0028933
7	70920120	rs11981945	C	T	C	1.12696	1.04171	1.21919	0.00289985
17	34379870	rs159297	A	G	A	0.872973	0.798301	0.95463	0.0029044
11	120739983	rs2155262	A	G	G	1.10742	1.03534	1.18452	0.00296489
10	66223200	rs922347	G	A	G	0.899494	0.83872	0.964672	0.00300079
9	114565721	rs1819343	A	G	A	1.10886	1.0357	1.18718	0.00300598
8	120814945	rs6987257	T	C	T	1.10928	1.03574	1.18803	0.00304089
3	150959980	rs1456143	T	C	T	1.12027	1.03921	1.20765	0.00304097
4	116604537	rs4557348	G	A	G	0.894743	0.83126	0.963075	0.00305696
19	3095929	rs308039	T	C	T	0.89539	0.832188	0.963391	0.00309085
6	67337761	rs4632879	T	G	T	0.703172	0.556821	0.887988	0.00309904
21	14652971	rs461058	A	G	A	1.11867	1.03854	1.20497	0.00310291
6	25882878	rs596774	T	C	T	1.11437	1.03719	1.19729	0.00310409
1	247413777	rs10925013	C	T	C	3.02766	1.45222	6.31224	0.00312402
10	12828470	rs2431624	A	G	A	1.31192	1.09571	1.57078	0.00312937
7	28529476	rs150608	C	A	C	0.784569	0.667893	0.921627	0.00314212
10	93783300	rs10736080	C	T	C	1.43364	1.12879	1.82083	0.00314553
10	9669739	rs964036	T	C	T	1.25178	1.07831	1.45315	0.00317158
16	52963951	rs9930367	A	G	A	0.838679	0.746134	0.942703	0.00318765
3	173524907	rs9790247	T	G	T	0.846238	0.757344	0.945566	0.0031941
12	56716008	rs2958149	A	G	A	0.885451	0.816578	0.960132	0.00323237
2	130308438	rs12987356	A	C	C	0.903021	0.843723	0.966486	0.0032439
2	150919702	rs1548632	C	T	C	0.861479	0.780012	0.951455	0.00326358
1	13798715	rs1015370	A	G	A	1.15937	1.05057	1.27944	0.00327048
8	140715701	rs4246122	C	T	T	1.10712	1.03452	1.18482	0.00327654
1	226722869	rs3768410	T	C	T	1.13179	1.04212	1.22917	0.00328604
2	145753727	rs2704788	G	T	G	1.14846	1.04713	1.25959	0.00331158
5	126229320	rs10037478	T	C	T	1.10975	1.03522	1.18964	0.00332688
8	19420224	rs7016592	A	G	A	1.14246	1.04526	1.2487	0.00332868
13	68637743	rs1507202	C	T	C	1.13958	1.04436	1.24348	0.00333562
10	71826828	rs2854992	A	G	A	1.13344	1.04246	1.23235	0.00334454
3	43162026	rs11713395	G	A	G	0.848793	0.760726	0.947054	0.00335385
21	23725730	rs2828464	T	C	T	1.23215	1.07173	1.41659	0.00335413
4	161346050	rs7689071	T	C	T	0.900285	0.83924	0.965771	0.00336617
13	54617090	rs1935162	C	A	C	0.881194	0.809736	0.958957	0.00337606
5	105530303	rs4495155	T	G	T	1.32947	1.09885	1.60849	0.00339314
8	128084722	rs2648892	C	A	C	0.86499	0.784982	0.953154	0.00340233
1	5151074	rs10753353	T	C	T	1.17047	1.05344	1.3005	0.00340425
13	40434264	rs2701887	A	G	A	0.508031	0.3228	0.799552	0.00342513
4	188733997	rs7688800	A	G	A	1.1079	1.0344	1.18662	0.00343671
10	93928497	rs866154	T	C	T	1.3282	1.09819	1.6064	0.00344173
12	80977512	rs2139732	C	T	T	1.10836	1.0345	1.1875	0.00345617
9	30818783	rs2502920	C	A	C	0.8981	0.83564	0.965228	0.00347495
16	64400472	rs2161691	C	T	C	0.901729	0.841284	0.966517	0.00347807
2	141564139	rs7602707	G	T	G	0.832452	0.736084	0.941436	0.00348503
13	102455075	rs7328480	C	T	C	0.865785	0.785975	0.9537	0.00349237
1	68134203	rs2566783	C	T	C	0.903575	0.844109	0.967231	0.0035093
14	32783078	rs9322911	A	G	A	1.11182	1.03543	1.19386	0.00351664
13	94792727	rs792302	A	G	A	1.10996	1.03486	1.19051	0.00351735
15	44658976	rs7165146	A	G	A	1.1138	1.036	1.19745	0.00353171
3	79915359	rs9871189	T	C	T	0.900108	0.83864	0.96608	0.00354329
1	244369635	rs3123705	C	T	C	0.900766	0.839647	0.966333	0.00355382
18	71354195	rs1244819	G	T	G	1.11122	1.03514	1.1929	0.00356483
5	118818673	rs1428638	T	C	T	1.23172	1.07061	1.41707	0.00357
1	119242618	rs10802083	A	G	A	1.18086	1.05593	1.32056	0.00357038
15	49014830	rs7183756	T	C	C	0.901628	0.840938	0.966698	0.00358444
3	21598371	rs6794736	G	A	G	1.13163	1.04125	1.22984	0.00359311
1	71670630	rs61159202	C	T	T	0.901552	0.840791	0.966704	0.00360093
4	173050519	rs10010277	T	C	T	0.717899	0.574279	0.897437	0.00361269
11	50765005	rs2193330	G	A	G	1.12272	1.03848	1.21381	0.00363034
1	161716109	rs10799917	C	T	C	0.816746	0.712571	0.936151	0.00364114
5	73110485	rs12657096	T	G	T	0.897961	0.835071	0.965587	0.00366983
18	50287879	rs8089314	T	C	T	1.18972	1.05811	1.3377	0.00368179
12	127340229	rs10773390	A	G	A	1.10569	1.03319	1.18328	0.00368841
16	67259059	rs8063476	A	G	A	3.24624	1.4661	7.18784	0.00369201
1	234922526	rs2802942	G	T	G	0.898648	0.836095	0.965881	0.00369586
6	31509077	rs2844498	C	T	C	0.90164	0.840756	0.966933	0.00370024
7	78792165	rs37860	C	T	C	1.24255	1.07303	1.43885	0.00370985
8	15102568	rs1454586	A	G	A	1.17674	1.05421	1.31353	0.00372159
6	33459573	rs2772372	T	C	T	1.45379	1.129	1.87202	0.00372526
1	110150825	rs7538131	T	C	T	1.19992	1.06082	1.35726	0.00374091
7	148183071	rs1859537	C	T	C	0.854011	0.767574	0.950183	0.00374887
19	35194041	rs9807816	T	G	T	1.11571	1.03609	1.20145	0.00375065
7	47957366	rs2254324	C	T	C	0.831384	0.733763	0.941994	0.00375997
6	158010855	rs6933203	A	C	C	0.904451	0.845045	0.968035	0.00376521
10	103458602	rs2986018	T	C	T	1.16264	1.04992	1.28747	0.00377825
5	103773195	rs601257	G	A	A	0.903273	0.843157	0.967675	0.00379054
16	20016691	rs2521477	T	C	T	1.11183	1.03479	1.19461	0.00381296
12	929436	rs4766375	A	C	A	0.876518	0.801619	0.958415	0.00382874
3	115610327	rs7634702	G	T	G	1.24076	1.07198	1.43611	0.0038328
11	79877972	rs387063	G	A	G	0.895724	0.831281	0.965163	0.0038432
5	33041265	rs1366263	A	G	A	0.421364	0.234506	0.757113	0.00384555
6	168933989	rs6921808	T	C	T	0.876472	0.801484	0.958475	0.00386026
22	44177781	rs139118	A	G	G	1.11593	1.03591	1.20213	0.00386132
4	7143367	rs4689068	G	A	A	0.899909	0.837775	0.966651	0.0038629
3	2010094	rs7631645	T	C	T	0.900652	0.838913	0.966936	0.00387735
12	95877650	rs1036429	T	C	T	1.11695	1.03617	1.20402	0.0038823
14	84547477	rs3008494	C	T	C	1.1132	1.03503	1.19728	0.0038934
12	116348494	rs1732331	T	C	T	1.11231	1.03476	1.19567	0.00389489
19	17000487	rs4808551	A	G	A	1.11849	1.03659	1.20685	0.00389763
12	12493544	rs10845559	C	A	C	1.1147	1.03545	1.20001	0.00390268
6	33597697	rs493871	G	A	G	1.10345	1.03207	1.17977	0.00391082
12	77887438	rs10777541	C	T	C	0.892451	0.826042	0.964198	0.00392568
4	165523223	rs2033765	A	G	A	1.11046	1.03413	1.19243	0.00393215
6	99020769	rs2572119	C	T	C	0.641428	0.474278	0.867486	0.00394096
1	157232533	rs1408555	A	G	G	1.10534	1.03258	1.18322	0.00394258
12	112602139	rs233716	C	T	T	1.10919	1.03373	1.19017	0.00394433
22	48517997	rs133498	A	G	A	0.747013	0.612491	0.911081	0.00398652
14	95577964	rs2273750	T	C	T	0.89784	0.834318	0.966198	0.00399631
13	39103609	rs9548612	G	A	G	0.898101	0.834679	0.966342	0.00402433
9	93009754	rs10122401	T	C	C	0.903698	0.843438	0.968263	0.00402796
1	112123936	rs398493	T	C	T	0.900234	0.837973	0.967122	0.00405066
9	79363793	rs10780305	G	A	G	0.902744	0.841896	0.967989	0.00405609
15	71299850	rs2138292	A	G	A	0.854622	0.767777	0.951291	0.00406231
2	77897383	rs1836032	C	T	C	0.803601	0.692244	0.932872	0.00406591
9	35176270	rs7033763	G	A	G	1.3819	1.10795	1.72359	0.0041138
13	52810521	rs1324997	C	T	C	1.45019	1.12491	1.86951	0.00412697
8	5542492	rs2693808	G	A	G	1.10921	1.03335	1.19064	0.00413806
8	32462022	rs6985581	C	T	C	0.835991	0.739605	0.944937	0.00415534
6	31504372	rs2534659	G	A	G	1.11758	1.03575	1.20586	0.00416283
2	187090105	rs4453657	T	C	T	1.18816	1.05599	1.33687	0.00416473
21	24411062	rs7280749	A	G	A	1.13748	1.04152	1.24227	0.0041751
1	1653319	rs12738319	A	G	A	1.11225	1.03414	1.19625	0.00418702
22	29455326	rs4823039	T	C	T	1.10558	1.03218	1.18421	0.00418807
11	100870209	rs590834	G	A	G	1.28105	1.08115	1.5179	0.00421751
1	24269208	rs10903067	G	A	A	1.10765	1.03273	1.188	0.0042208
1	98432480	rs11166012	G	A	A	0.904438	0.844273	0.968892	0.00423995
1	232112341	rs9724918	C	T	T	1.10316	1.03137	1.17995	0.00424302
1	17005181	rs3738814	A	G	A	1.11416	1.03456	1.19987	0.00425547
6	86836450	rs2208166	T	C	T	0.854136	0.766592	0.951679	0.00426792
19	20807649	rs8112535	C	T	C	1.10629	1.03224	1.18567	0.00427117
1	243465862	rs946823	C	T	C	1.208	1.06114	1.37518	0.00427178
8	43930942	rs8188559	G	A	G	0.89436	0.828419	0.96555	0.00427551
2	217748970	rs10932730	A	G	A	2.43891	1.32235	4.49825	0.00430918
2	140040174	rs1918615	A	G	A	1.10386	1.03143	1.18138	0.00432325
4	171219249	rs10024451	T	C	T	0.757249	0.625579	0.916634	0.00432897
2	221520824	rs2710512	G	A	G	2.04754	1.25117	3.3508	0.00435011
13	46922086	rs7331408	T	C	T	0.840037	0.745165	0.946988	0.00436115
1	10784501	rs710139	T	C	T	0.881297	0.807961	0.961289	0.00436337
4	17447280	rs2518652	A	G	A	1.16185	1.04795	1.28813	0.00437547
4	10315255	rs7666514	A	C	A	1.19321	1.0567	1.34734	0.00437559
6	32937204	rs1042337	G	A	G	0.898871	0.835313	0.967265	0.0043785
9	88232441	rs1550286	C	T	C	1.10857	1.03269	1.19002	0.00438244
16	8459238	rs12709230	C	T	C	0.806864	0.696086	0.935271	0.00439837
1	210645003	rs6683572	A	G	A	0.904894	0.844742	0.969328	0.00440497
1	13647446	rs12728383	G	A	G	1.1427	1.04243	1.25261	0.00441579
5	123323415	rs1428393	C	T	T	0.903438	0.842429	0.968866	0.00441885
3	99139806	rs2966543	G	A	G	1.16276	1.04808	1.28998	0.00442088
18	14496038	rs6505911	A	C	A	1.10824	1.03245	1.1896	0.004463
2	128540142	rs12692082	G	A	A	0.90132	0.839029	0.968236	0.00446386
1	194365777	rs4417046	C	T	C	0.86609	0.784374	0.95632	0.00446544
6	12047005	rs9470854	T	C	T	1.1387	1.04106	1.2455	0.00451455
10	79285450	rs1250569	T	C	T	1.10306	1.03085	1.18032	0.00451901
14	54200684	rs7142384	T	C	C	1.11527	1.03437	1.20251	0.00451942
5	125789123	rs329152	T	C	T	1.14029	1.0415	1.24845	0.00451981
10	51343348	rs211085	C	T	C	1.40232	1.11038	1.77102	0.00452471
18	1970915	rs6505984	C	T	C	0.899529	0.836108	0.96776	0.0045331
7	19235042	rs10244561	T	C	T	0.904766	0.844343	0.969513	0.00454065
13	113946352	rs1014090517	A	G	A	1.17946	1.05237	1.3219	0.00454723
3	57042168	rs6445846	T	C	T	1.24498	1.07007	1.44849	0.00455866
5	167570142	rs11948504	G	T	G	1.20589	1.05949	1.37253	0.0045836
2	147618269	rs4369802	T	C	T	0.818846	0.713147	0.940212	0.0045937
9	34077561	rs4008760	T	C	T	1.11148	1.03314	1.19577	0.0045962
1	91604407	rs1192410	A	G	A	1.10636	1.03165	1.18647	0.0046026
2	196620038	rs7581407	A	G	A	0.786739	0.666456	0.928731	0.00460645
4	167894715	rs12504481	A	C	A	1.12257	1.03628	1.21605	0.00460646
16	17940847	rs7186499	A	G	A	0.879455	0.804674	0.961185	0.00460983
21	39851981	rs386095	A	G	A	0.876287	0.799729	0.960174	0.00463664
1	81666613	rs561278	A	C	C	1.10476	1.03113	1.18365	0.00463903
17	35190143	rs9916381	A	G	G	0.906723	0.84728	0.970337	0.00464956
3	64891102	rs813800	T	C	T	0.90518	0.844834	0.969836	0.00465387
3	28676963	rs9875884	T	C	T	1.10708	1.03177	1.18788	0.0046547
8	18772243	rs335230	G	A	G	0.876557	0.800105	0.960313	0.00465899
10	75253943	rs1113313	C	T	C	1.11953	1.03526	1.21065	0.00468381
3	39211178	rs3938106	A	G	A	1.22966	1.0655	1.41911	0.0046883
3	3873020	rs2322423	T	C	T	1.37598	1.10273	1.71695	0.00471787
11	105715845	rs590928	G	A	A	1.10136	1.03	1.17765	0.00472773
13	61422843	rs6562178	T	C	T	1.10641	1.03145	1.18682	0.0047294
16	77637284	rs11648988	T	C	T	1.11579	1.0341	1.20394	0.00473865
11	65179387	rs1195968	T	C	C	0.901862	0.839463	0.968898	0.00474773
3	134495055	rs6804907	T	G	T	0.829409	0.728422	0.944396	0.00474869
11	41432919	rs7939433	T	C	C	1.10936	1.03218	1.19231	0.00478921
8	27002110	rs11135969	G	A	G	1.11185	1.03285	1.19689	0.00481066
9	129540644	rs2498905	C	A	A	1.10685	1.03142	1.1878	0.00481469
1	54271127	rs9662034	C	T	T	1.10672	1.03138	1.18756	0.00481746
8	46209773	rs4285502	C	T	C	0.894362	0.827561	0.966554	0.00481941
7	21187245	rs10239218	T	C	T	0.821232	0.716088	0.941814	0.00483885
4	182662609	rs10428431	G	T	G	0.711684	0.561726	0.901676	0.00484337
2	128369127	rs13384975	A	C	C	0.905825	0.845577	0.970364	0.00485247
11	17473504	rs2283255	A	G	G	0.903813	0.842379	0.969727	0.00486403
8	23919425	rs1511387	A	C	A	1.10796	1.03165	1.18991	0.00486489
11	79072476	rs6592821	C	A	A	1.10565	1.03099	1.18573	0.00487301
7	34449082	rs11769719	A	G	G	0.902291	0.83996	0.969248	0.00487487
1	67203833	rs6588250	T	G	T	0.469316	0.277042	0.795034	0.00491059
11	41055256	rs2220739	G	A	A	0.906932	0.84725	0.970817	0.00491244
9	17039314	rs263580	T	G	T	1.10562	1.0309	1.18575	0.00491531
1	83595832	rs4370778	G	A	G	2.02891	1.23919	3.32189	0.00491589
22	50497029	rs134972	A	G	A	1.99807	1.23344	3.2367	0.00491658
18	7404468	rs12607280	C	T	C	0.821336	0.716056	0.942096	0.00491995
6	30805745	rs3129989	T	C	T	0.86217	0.777477	0.956087	0.0049359
3	122918736	rs9875236	C	T	C	1.12873	1.03724	1.2283	0.00499076
17	68800311	rs9912164	G	A	G	0.904757	0.843683	0.970253	0.00500304
1	83598704	rs4427428	A	G	A	2.02435	1.23683	3.31328	0.00502351
18	55501012	rs3017183	C	T	C	1.15522	1.04444	1.27774	0.00502579
5	175373698	rs265944	G	A	A	0.896826	0.831118	0.967729	0.00503302
1	147504660	rs584323	A	G	A	1.11899	1.03444	1.21046	0.00503926
2	50306409	rs2682002	A	G	A	0.838583	0.741477	0.948407	0.005054
2	137259823	rs11897714	T	C	T	1.26307	1.07278	1.48712	0.00505944
3	189506652	rs12152538	G	A	G	0.904671	0.843456	0.970327	0.00506916
17	6463569	rs11657858	T	C	T	0.905624	0.844963	0.97064	0.00507287
18	1917736	rs1397064	A	G	G	1.10389	1.03015	1.18291	0.0050803
2	198686490	rs7420621	C	A	C	0.904637	0.843372	0.970354	0.0050932
1	91300736	rs380600	C	A	C	1.10707	1.03099	1.18876	0.00510603
6	29566093	rs3094577	A	G	A	1.14556	1.0416	1.2599	0.00511637
22	24940853	rs6004361	A	G	A	1.13266	1.03801	1.23594	0.00514348
2	108905744	rs154997	G	A	G	1.70622	1.17351	2.48076	0.00514518
15	71577133	rs4321149	A	G	A	1.10896	1.03146	1.19229	0.00514526
4	179333243	rs4241708	G	A	G	1.43729	1.11471	1.85322	0.00515225
6	18316873	rs9371041	T	C	T	1.50377	1.12987	2.00141	0.00515662
6	82076801	rs10806236	G	A	A	1.10289	1.02971	1.18127	0.00517823
10	20789611	rs1926207	T	G	T	0.897398	0.831767	0.968208	0.00521003
14	86239415	rs2373162	G	A	G	1.11476	1.03295	1.20305	0.00521467
6	152628095	rs9371620	T	G	T	1.10534	1.03033	1.18581	0.00521556
6	32458206	rs6457592	T	C	T	1.10982	1.03157	1.194	0.00521808
5	170782274	rs10057042	A	G	A	0.664545	0.498824	0.885322	0.00523477
17	54827165	rs2958876	G	A	G	1.24985	1.06868	1.46173	0.00524883
14	44610038	rs1016047	A	G	A	1.12501	1.03568	1.22204	0.00526344
9	29018856	rs2210558	G	A	G	0.895219	0.828228	0.967628	0.0052841
8	141991149	rs4917268	G	A	G	1.1014	1.02913	1.17875	0.00528563
4	78366477	rs11932185	A	G	A	0.908925	0.849925	0.97202	0.0052913
1	245315277	rs9428356	C	T	C	1.10954	1.03137	1.19363	0.00529393
11	65004661	rs566189	C	T	C	0.694149	0.537038	0.897223	0.00529889
6	129291128	rs1994620	T	C	T	0.907986	0.848387	0.971772	0.00532676
9	110983716	rs2192591	C	A	A	1.11181	1.03189	1.19791	0.00535499
4	128613959	rs1216426	A	C	A	0.889869	0.819688	0.966058	0.00537224
3	159394816	rs4417909	G	T	G	1.10534	1.03008	1.1861	0.00537384
18	77160709	rs1812680	C	T	C	0.85057	0.758924	0.953284	0.00539485
1	111363412	rs4838908	C	T	C	1.21205	1.05848	1.38791	0.00540026
10	9849535	rs7080250	G	A	G	0.904783	0.843182	0.970884	0.00541443
2	219870099	rs13014166	G	A	G	1.34422	1.09128	1.65579	0.0054149
1	63673525	rs1884466	T	C	T	0.906044	0.845168	0.971304	0.00542838
3	155950066	rs819845	C	A	C	0.866716	0.783546	0.958713	0.00545048
1	88625653	rs501330	A	G	A	0.825368	0.720853	0.945036	0.00546408
2	186960921	rs11675639	T	C	T	1.9383	1.21512	3.09188	0.00547322
2	211066962	rs13013556	G	A	G	0.893393	0.825064	0.96738	0.00548818
1	236207354	rs1254205	C	T	C	1.13962	1.03919	1.24975	0.00549164
9	135729934	rs543102	G	A	G	0.905683	0.844509	0.971288	0.00549603
10	15495959	rs7094296	C	T	C	0.81189	0.700755	0.940649	0.0055269
16	87020107	rs9930662	G	A	G	0.890789	0.820901	0.966628	0.00553425
8	139564576	rs2542454	T	G	G	0.903843	0.841536	0.970764	0.00553432
4	169925185	rs6847751	G	A	A	1.10701	1.03029	1.18945	0.0055352
12	25429444	rs10842560	A	G	G	0.909392	0.850368	0.972513	0.00553699
9	16278132	rs1332478	A	C	A	1.10563	1.0299	1.18693	0.00553949
12	115765954	rs780881	A	C	A	1.10517	1.02976	1.1861	0.00555271
2	96399761	rs631746	A	G	A	1.10973	1.031	1.19448	0.00555412
6	100485596	rs12208241	T	C	C	0.897125	0.830847	0.968689	0.0055653
11	131877014	rs11819851	G	A	G	1.13164	1.03683	1.23511	0.00560133
3	10350918	rs3843384	C	T	C	1.1054	1.02974	1.18663	0.0056048
4	188284967	rs6848150	A	C	A	1.10636	1.03	1.18838	0.00560673
15	31670276	rs4456464	G	A	G	1.18884	1.05186	1.34366	0.00561359
7	23718733	rs12672950	C	T	C	1.29994	1.07968	1.56512	0.00561684
3	63254224	rs7646573	C	T	T	0.905891	0.844647	0.971576	0.00565172
19	33265471	rs10405585	T	G	T	1.10126	1.02854	1.17913	0.00565306
4	59087398	rs13116055	A	G	A	0.876282	0.79803	0.962208	0.00565481
4	18574092	rs4235396	G	A	G	0.901409	0.837502	0.970193	0.00566647
13	109786818	rs9515121	A	G	G	0.908869	0.849366	0.972541	0.00567638
16	88780410	rs477203	A	G	A	2.33509	1.28008	4.25961	0.00569152
5	105732813	rs13187433	T	C	T	0.739236	0.596716	0.915794	0.00569323
14	71067658	rs2332507	C	T	C	0.894547	0.826574	0.96811	0.00571398
15	27183746	rs208124	G	A	G	1.10781	1.0302	1.19125	0.00572688
14	25178277	rs1958677	T	C	T	1.10376	1.02907	1.18388	0.00575562
2	51826292	rs6545238	A	C	A	1.10731	1.02999	1.19044	0.00577756
1	153966654	rs11264736	C	T	C	0.791916	0.670993	0.934631	0.00578695
15	62730231	rs12441467	G	A	G	0.908927	0.849324	0.972713	0.00579013
11	6667311	rs2345348	C	T	C	0.518203	0.324788	0.8268	0.00581824
1	59239512	rs1373646	C	T	C	0.85544	0.765578	0.955849	0.00582613
4	166949671	rs4327515	A	G	A	0.814787	0.704383	0.942495	0.00583019
7	8652954	rs10281289	A	G	A	0.867332	0.783856	0.959697	0.00583867
4	46996863	rs979273	C	T	C	1.10255	1.02858	1.18184	0.00586501
5	67010118	rs778444	G	A	G	0.895884	0.828419	0.968843	0.00591651
5	90134334	rs2973384	C	A	C	1.20789	1.05586	1.3818	0.00592501
3	76659010	rs1349012	A	G	A	1.18461	1.04991	1.33658	0.00594383
5	106860648	rs295038	C	A	C	1.09952	1.02764	1.17644	0.00595598
2	50792094	rs9751737	C	T	C	1.11928	1.03284	1.21296	0.0059982
1	958339	rs4970445	G	A	G	1.12632	1.03458	1.22621	0.00606719
17	79152279	rs2612774	G	A	A	0.909427	0.849795	0.973244	0.00607466
19	38946919	rs1865048	C	T	C	1.11214	1.03079	1.19991	0.00609925
17	75279628	rs11077782	A	C	A	0.816999	0.707102	0.943977	0.00610368
16	62536220	rs288588	C	T	T	0.90872	0.848624	0.973072	0.00610853
2	34889851	rs280781	C	T	T	1.10162	1.02793	1.1806	0.00614935
19	22430427	rs11085534	T	C	T	1.28194	1.0732	1.53129	0.00616282
19	32493978	rs7250367	G	A	G	1.13757	1.03733	1.24749	0.00616652
7	150536131	rs9632622	T	C	T	0.897104	0.83002	0.96961	0.00617757
8	93311544	rs1447301	T	G	T	0.876054	0.796871	0.963105	0.00618651
6	99023526	rs6913415	C	T	C	0.899271	0.833451	0.970288	0.00618662
1	88375111	rs4656041	T	G	G	1.09836	1.02699	1.17469	0.00620404
6	516350	rs2493013	A	C	C	0.909088	0.84907	0.973349	0.00623565
2	9276528	rs7596770	A	G	A	1.17221	1.04603	1.31361	0.00624906
3	37995423	rs6808011	C	T	C	0.818666	0.709266	0.944939	0.00626092
2	208244034	rs10202116	T	C	T	1.5356	1.12893	2.08877	0.00628454
7	129606609	rs10954247	T	C	T	0.903418	0.839923	0.971713	0.00630059
3	163099670	rs9817376	C	A	C	0.903596	0.840164	0.971816	0.00633729
13	85545585	rs599428	A	G	A	3.40692	1.41296	8.21478	0.00633781
20	42221885	rs4349400	A	G	G	0.909434	0.849486	0.973611	0.00635972
6	33290666	rs456261	G	A	A	1.10233	1.02781	1.18225	0.00637196
12	19587291	rs7486560	G	A	G	1.17858	1.04734	1.32626	0.00637374
11	9454501	rs7103931	C	T	C	0.897919	0.831071	0.970145	0.00637531
1	61083908	rs2800059	T	C	T	0.881733	0.805484	0.965199	0.00638062
6	157466729	rs34170902	G	T	G	0.826513	0.720736	0.947815	0.00639047
13	47685327	rs4942665	A	C	A	1.33449	1.08443	1.64221	0.00641817
2	12477833	rs6740022	T	C	C	1.11429	1.03085	1.20449	0.00642907
8	60337760	rs6982717	G	T	G	1.10879	1.02936	1.19434	0.00646755
18	71223062	rs7244449	G	A	G	1.3604	1.08997	1.69793	0.00649295
3	30687380	rs1367609	T	G	T	0.907633	0.846439	0.97325	0.00650238
16	87115428	rs8053394	G	A	G	1.13129	1.0351	1.23642	0.0065107
6	17363915	rs6459534	A	C	C	0.905902	0.84365	0.972747	0.00651541
4	55925910	rs2121517	C	A	A	1.10511	1.02833	1.18762	0.00652324
6	32793576	rs2621380	C	T	C	1.10519	1.02834	1.18777	0.00652517
1	85580878	rs2297140	C	A	C	0.907	0.845398	0.973092	0.00652719
1	37055950	rs581878	C	A	C	1.38939	1.09622	1.76097	0.00653477
19	56057011	rs398599	T	C	T	0.904576	0.841456	0.972431	0.00657841
16	7937378	rs4523909	C	T	C	0.905157	0.842375	0.972618	0.00658837
7	6070006	rs13231797	A	G	A	1.14663	1.03883	1.26562	0.00660534
5	22227256	rs10056210	T	C	C	0.909908	0.849977	0.974064	0.00661004
18	10605224	rs66506960	G	A	A	1.09956	1.02675	1.17754	0.00662789
11	122886646	rs3107612	T	C	T	1.31283	1.07859	1.59794	0.00663854
2	233168637	rs62192877	G	T	G	1.10087	1.02707	1.17997	0.00664138
7	78972303	rs2191724	T	G	T	0.880156	0.802647	0.965151	0.00664511
11	38261628	rs7927056	T	C	T	2.13288	1.23422	3.68585	0.00664859
2	230249624	rs4143559	G	A	A	0.908621	0.847865	0.97373	0.00664945
2	208465663	rs34242215	A	G	G	1.09775	1.02624	1.17424	0.00665311
5	159766478	rs6885791	C	T	C	3.22922	1.3847	7.53077	0.0066607
21	28097205	rs8131795	T	C	T	1.1022	1.02738	1.18246	0.00666198
8	86661483	rs13268738	C	T	C	1.09924	1.02657	1.17704	0.00669573
10	22586366	rs10218845	G	A	G	0.736035	0.589773	0.91857	0.00669986
14	50054064	rs4900981	A	G	A	0.818996	0.708916	0.94617	0.00670204
18	43809394	rs7235327	T	C	T	0.882958	0.806833	0.966266	0.00681082
9	111309599	rs1930303	G	A	G	1.10811	1.0287	1.19365	0.00681476
2	8973079	rs79106138	C	T	C	1.40917	1.09903	1.80683	0.00684078
22	47502836	rs6008239	C	T	C	0.904988	0.841808	0.972909	0.00685547
11	11949618	rs10741564	G	A	A	0.9114	0.852122	0.974802	0.00685662
6	81250390	rs9341865	T	C	T	1.1026	1.02722	1.18351	0.00686517
14	104094675	rs1744286	A	G	A	0.843427	0.745457	0.954271	0.00687252
7	107687870	rs1858929	G	A	G	1.10255	1.02718	1.18345	0.00688492
4	6163112	rs55851362	T	C	T	0.883347	0.807349	0.966499	0.00688519
1	11721916	rs6676319	G	A	G	0.905287	0.842255	0.973036	0.00688573
1	175733315	rs516500	C	T	C	0.902074	0.837083	0.972111	0.006905
5	20747827	rs1820729	G	T	T	1.10377	1.02746	1.18575	0.00691201
13	26789551	rs9512378	G	A	G	1.19398	1.04972	1.35806	0.00696412
16	10200795	rs9938370	A	G	A	1.10463	1.02761	1.18742	0.00696445
6	152126186	rs2747655	T	C	T	1.13408	1.03499	1.24266	0.00699457
1	1086035	rs3737728	A	G	A	1.15677	1.04058	1.28595	0.00700957
10	13080809	rs570158	T	C	T	0.90146	0.83598	0.972069	0.00701274
18	65239102	rs569058	C	T	T	0.909714	0.849235	0.9745	0.00702017
3	113217399	rs1466848	C	T	C	1.17623	1.0453	1.32356	0.00702095
9	93107267	rs4743886	A	G	A	0.827536	0.721061	0.949733	0.00706195
3	155187951	rs1385477	T	G	T	1.11015	1.02887	1.19785	0.00706537
2	64788062	rs6732000	G	A	A	0.91062	0.850637	0.974832	0.00707805
2	127124081	rs10169310	C	T	T	0.912367	0.853444	0.975357	0.00709247
6	54317505	rs6909083	T	C	T	0.887528	0.81368	0.968077	0.00710385
19	10239014	rs8113091	T	C	C	1.09601	1.02523	1.17168	0.00711587
9	87776738	rs4878129	C	T	C	1.1209	1.03149	1.21806	0.00712312
11	45500138	rs896335	T	C	T	0.761464	0.62435	0.928689	0.00713816
13	34128108	rs4941784	A	G	A	0.904665	0.840955	0.973203	0.0071672
6	107631955	rs846972	A	C	A	0.869635	0.785451	0.962843	0.00716933
10	129253609	rs534451	T	C	T	0.718514	0.564606	0.914375	0.00719288
18	7404659	rs9960918	G	T	G	0.434774	0.236829	0.798166	0.00720308
10	22585258	rs7912132	A	G	A	1.28499	1.07021	1.54286	0.00720661
7	28322677	rs10479815	G	A	A	0.904233	0.840203	0.973143	0.00722091
17	5771168	rs8064725	T	C	C	0.904462	0.840567	0.973213	0.00722396
16	84113256	rs12596367	T	G	T	0.896139	0.827219	0.970801	0.00723692
6	92667249	rs6913450	T	C	T	1.26956	1.06653	1.51123	0.00726453
15	77023792	rs12148413	A	G	A	0.888757	0.815417	0.968692	0.0072781
9	118001470	rs1930697	C	T	T	0.912098	0.852823	0.975493	0.00728118
8	106606023	rs3101543	G	A	G	0.904413	0.840406	0.973295	0.00730196
10	1016535	rs7068703	T	G	T	0.911169	0.851278	0.975273	0.00732379
1	34539671	rs4622033	C	T	C	1.12122	1.03127	1.21902	0.00732848
13	42717153	rs1323612	C	T	C	1.20749	1.05203	1.38593	0.00733397
14	53363527	rs10138849	A	G	A	0.907659	0.845566	0.974312	0.00736767
5	11343088	rs32129	A	G	G	0.908712	0.847255	0.974627	0.00737753
14	79716599	rs178386	C	T	C	0.832082	0.727388	0.951845	0.0073776
2	70329205	rs6750178	T	C	T	1.09999	1.02588	1.17947	0.0074124
19	32691414	rs881273	G	A	G	0.910606	0.850281	0.975211	0.00741256
19	50090813	rs452115	A	G	A	1.33685	1.08084	1.6535	0.00743552
8	4740734	rs1673237	T	C	T	1.27569	1.06734	1.52471	0.00744445
19	50857562	rs266876	C	T	C	1.10123	1.02614	1.18181	0.00744512
2	189114994	rs13391332	G	A	G	1.11677	1.02998	1.21086	0.00745656
5	169444320	rs7444051	T	C	T	1.25632	1.06291	1.48492	0.00746795
6	162653375	rs2803099	C	T	C	1.21837	1.05417	1.40814	0.0074893
6	135111745	rs7766963	T	C	T	0.908883	0.847389	0.974839	0.00752009
7	141905284	rs4726479	G	A	G	1.10239	1.02633	1.1841	0.00753201
8	124038416	rs4871453	C	T	C	0.906915	0.844192	0.974297	0.00753875
11	8646133	rs10840099	T	C	C	0.910978	0.850757	0.975462	0.0075416
9	78188556	rs62568309	T	C	T	0.549067	0.353692	0.852364	0.00754316
3	106354341	rs4481183	T	C	T	0.760189	0.621671	0.92957	0.00754981
5	149784724	rs6891670	C	T	C	1.11513	1.02944	1.20795	0.00755703
17	15302704	rs170745	A	G	A	1.14019	1.03553	1.25542	0.00756741
9	127281224	rs2812295	A	G	A	0.897467	0.828968	0.971626	0.00757312
1	37491775	rs6700586	G	A	G	0.911141	0.850966	0.975571	0.00759836
20	62083348	rs6142710	G	A	G	0.889916	0.816882	0.969481	0.0075995
5	157369395	rs2591459	A	G	G	0.906171	0.842916	0.974172	0.00761372
1	76978436	rs1102452	A	G	A	0.813605	0.699207	0.946719	0.00762639
14	63534316	rs1255785	T	C	T	1.25943	1.0631	1.49201	0.0076383
4	82211768	rs4693023	C	T	C	1.17181	1.04295	1.31659	0.00764124
9	27803738	rs3922981	A	G	A	1.12394	1.03148	1.22469	0.00764228
11	12983914	rs7942018	T	C	C	0.907466	0.844968	0.974587	0.00765284
2	191546927	rs4853613	T	C	T	1.12251	1.03111	1.22201	0.00765352
13	75120993	rs9543851	T	G	T	1.10031	1.02563	1.18044	0.00768803
15	25522419	rs6420960	A	G	A	0.877305	0.796795	0.96595	0.00769039
3	166150409	rs7647506	G	A	G	1.12192	1.03091	1.22097	0.00769264
11	14240340	rs7948160	G	A	G	1.10543	1.02687	1.19	0.00769949
12	65713657	rs2358941	T	G	T	0.862779	0.774022	0.961714	0.00770395
4	38548684	rs4833068	A	G	A	0.876886	0.796101	0.965868	0.00771673
5	99929757	rs2924606	T	G	T	0.899102	0.831424	0.972288	0.00772585
7	55813232	rs10244972	A	G	A	1.09875	1.02519	1.17758	0.00772676
6	97070127	rs1933463	A	G	A	0.781814	0.652235	0.937137	0.00776335
7	135799922	rs7796064	C	T	C	0.908767	0.846957	0.975088	0.00776964
5	23882559	rs319610	T	C	T	0.785754	0.657931	0.938409	0.00777412
13	46936530	rs7322944	C	T	T	0.909137	0.847545	0.975206	0.00778157
1	163088232	rs2661311	T	C	C	1.09494	1.02418	1.17059	0.00779238
6	57893429	rs10890560	C	T	T	1.09474	1.02412	1.17022	0.00779879
17	81027500	rs8072124	G	A	A	1.11164	1.02822	1.20184	0.00783611
17	36905135	rs8080842	A	G	A	1.2169	1.05292	1.40641	0.00785433
14	20876494	rs10131463	G	A	G	1.14785	1.03688	1.2707	0.00785994
2	20172509	rs2090035	A	C	A	0.877448	0.796786	0.966277	0.00787934
18	33450954	rs6507037	C	T	C	0.884973	0.808684	0.968459	0.00788935
15	27019010	rs6606855	G	A	A	1.11355	1.02861	1.20551	0.00789047
1	173106490	rs6674831	G	A	G	0.762259	0.623888	0.931319	0.00790359
6	1340923	rs12110825	A	G	A	1.09963	1.0252	1.17945	0.00790396
2	187595734	rs4667178	T	C	C	1.09462	1.02396	1.17014	0.00791825
5	165211819	rs1422681	C	A	C	0.897747	0.829044	0.972144	0.00792055
19	57359773	rs862710	C	A	C	1.22899	1.05546	1.43105	0.00793103
9	71688037	rs944038	C	T	C	2.09727	1.21388	3.62355	0.0079385
6	151225956	rs6557121	A	G	A	2.37727	1.25431	4.50558	0.00794101
8	123116595	rs4871350	G	T	T	0.907298	0.844397	0.974884	0.00795736
11	40335988	rs7951648	C	T	C	1.1283	1.03207	1.23352	0.00795855
11	84749812	rs6592202	C	T	T	1.09831	1.02482	1.17708	0.00796253
20	22130396	rs1303872	C	T	T	0.906846	0.843654	0.974771	0.00796993
5	9357722	rs3797994	C	T	C	0.892664	0.820844	0.970768	0.00797281
1	55609206	rs769978	A	G	A	0.873646	0.790655	0.965348	0.00799073
5	6757555	rs5001282	T	C	T	0.911136	0.850578	0.976007	0.00800055
11	79822348	rs505774	A	G	A	1.1298	1.03235	1.23645	0.00800786
9	136653854	rs1332794	G	A	G	1.13464	1.0335	1.24567	0.00800977
10	3800408	rs10904097	T	C	T	0.87632	0.79483	0.966165	0.00802137
6	155201203	rs10457910	C	T	C	1.09599	1.02419	1.17284	0.00802183
12	128986536	rs11060054	T	C	T	1.09788	1.02464	1.17636	0.00802421
13	94150528	rs608537	C	T	C	1.47314	1.10624	1.96174	0.00802926
3	150167206	rs6793172	A	G	A	1.09719	1.02439	1.17516	0.00809597
4	179199000	rs1457407	A	G	A	0.821057	0.70957	0.95006	0.00809664
11	44499047	rs7951218	C	A	A	0.911675	0.851354	0.976269	0.00810633
20	51424103	rs4809842	T	C	T	1.22162	1.05332	1.41681	0.00812676
6	164753774	rs1467085	G	A	A	1.09648	1.02417	1.1739	0.00814395
7	78743482	rs6951046	T	C	T	0.905033	0.840531	0.974485	0.00816643
11	105960621	rs583452	A	G	A	0.8956	0.825327	0.971857	0.008177
7	146597864	rs347181	A	G	A	0.898348	0.829724	0.972648	0.00819359
2	159546889	rs4665079	A	C	A	0.888497	0.813918	0.969909	0.00821734
15	33892854	rs8037310	G	A	G	0.568561	0.374047	0.864228	0.00821818
14	82832050	rs7141864	A	C	C	1.10059	1.02508	1.18166	0.00822001
7	24422298	rs7811649	T	C	T	1.11074	1.02751	1.20071	0.00822391
3	5053523	rs2671753	A	G	A	1.10803	1.02685	1.19563	0.00822922
6	117643382	rs9401023	G	T	G	1.11595	1.02866	1.21064	0.00829182
2	68809634	rs13418802	T	C	T	1.1647	1.04002	1.30432	0.00830785
5	56698304	rs6450397	C	T	T	0.899394	0.831287	0.97308	0.00831077
22	20537281	rs2269831	G	A	A	1.09459	1.02353	1.17059	0.00831349
9	34866187	rs1566597	A	G	A	1.15501	1.03777	1.2855	0.00832118
5	159143343	rs7721310	C	T	T	0.908916	0.84667	0.975739	0.00832737
15	37501419	rs1563576	C	T	C	1.34562	1.07923	1.67778	0.00835565
22	19530556	rs5748260	T	C	T	1.14136	1.03454	1.25921	0.00835989
2	66234310	rs902145	T	C	T	1.22657	1.05383	1.42761	0.00836322
7	41480214	rs1482553	C	T	C	1.10158	1.02515	1.18371	0.00836572
9	21407605	rs4978115	G	A	G	0.901854	0.835175	0.973857	0.00839097
1	181314560	rs2804704	C	A	C	1.76756	1.15724	2.69975	0.00839528
7	132507246	rs156958	T	C	T	1.10937	1.02694	1.19842	0.00842052
8	107760041	rs4735009	T	C	T	0.905393	0.840866	0.974873	0.00842492
3	48370245	rs12487765	T	C	T	0.885829	0.809413	0.96946	0.00844367
9	38200535	rs2810745	A	G	G	0.909357	0.847249	0.976018	0.00847592
7	115386686	rs10267100	T	G	T	0.856121	0.762613	0.961095	0.0084781
12	57586758	rs10747780	T	C	T	1.12262	1.02999	1.22358	0.00847821
3	35897303	rs10049409	A	G	A	1.10019	1.02468	1.18127	0.00848946
7	29407526	rs2189439	A	G	G	0.912379	0.852147	0.976869	0.00849899
5	78899989	rs193123	A	G	A	1.39366	1.08837	1.78458	0.00850768
12	29977572	rs2647384	G	A	G	1.09839	1.02423	1.17793	0.00850894
12	78422419	rs10745844	T	C	T	1.09832	1.0242	1.1778	0.00852149
10	77944636	rs1366047	C	T	C	1.10723	1.02629	1.19456	0.00854129
8	2857450	rs2930287	A	G	G	1.09883	1.0243	1.17878	0.00854241
14	36550498	rs11156919	G	T	T	0.911916	0.851322	0.976824	0.00857907
4	123976004	rs4833962	A	C	C	0.913672	0.854161	0.97733	0.00860775
1	42165929	rs3754282	A	G	A	1.11226	1.02736	1.20418	0.00863674
3	10549052	rs4684044	T	G	G	0.910357	0.848714	0.976476	0.00865451
1	17699940	rs12139706	G	A	G	1.11765	1.02858	1.21443	0.0086623
7	14826083	rs60557254	C	T	C	0.911095	0.849882	0.976716	0.00869344
6	148976731	rs2486408	C	T	C	0.897336	0.827564	0.97299	0.00871683
9	73769980	rs7857047	G	A	G	0.81888	0.705295	0.950757	0.00872185
6	25192836	rs4144129	A	G	A	0.880691	0.800923	0.968403	0.00872188
6	162488243	rs1893111	C	T	C	0.808483	0.689716	0.947701	0.00872572
6	66672794	rs7739015	G	A	G	1.16974	1.04039	1.31518	0.00873791
20	10287078	rs4642009	T	C	T	1.14158	1.03394	1.26041	0.00877649
15	25110321	rs8030752	C	T	C	1.24596	1.05698	1.46874	0.00878777
6	30328294	rs1110464	C	T	C	0.909517	0.847228	0.976385	0.00878791
17	10115425	rs11078832	A	G	G	1.09994	1.02428	1.18119	0.00880337
19	40274418	rs1991823	G	A	G	1.09843	1.02389	1.17839	0.00882981
21	17358362	rs206996	A	G	A	1.34961	1.07832	1.68915	0.0088311
15	58432643	rs8033940	G	A	G	0.905125	0.840041	0.975251	0.0088396
13	84935298	rs9565981	T	C	T	0.895569	0.824594	0.972653	0.00884041
9	126325923	rs10739669	G	A	A	0.912255	0.851628	0.977197	0.00886063
9	126114771	rs7044456	C	A	C	0.910097	0.848064	0.976667	0.00891126
10	12884428	rs4748006	G	A	A	1.09434	1.02285	1.17083	0.00891493
2	179336728	rs10930865	A	C	A	0.871333	0.785833	0.966136	0.00895582
16	14645866	rs12923774	C	T	C	0.911544	0.850375	0.977112	0.00896787
11	35835315	rs792653	G	A	G	0.873806	0.789714	0.966852	0.00897767
1	233538783	rs780235	C	T	C	0.911324	0.850005	0.977066	0.00898024
2	179942139	rs6729414	G	A	G	0.887621	0.811684	0.970662	0.00898707
5	67133501	rs2371882	G	T	G	0.277411	0.105974	0.72619	0.00901189
9	86622755	rs7021556	C	T	T	1.09624	1.02317	1.17453	0.00903123
12	27832584	rs5022769	T	C	T	0.864022	0.774225	0.964234	0.00904179
11	129413792	rs3019121	A	G	A	0.82903	0.720133	0.954394	0.00906346
6	71708871	rs2754051	G	A	G	0.905054	0.839703	0.975491	0.00908384
1	57448492	rs12044871	C	A	C	1.11409	1.0272	1.20833	0.00911648
10	118527838	rs538735	G	A	A	0.91332	0.853134	0.977752	0.00913772
11	107659309	rs616241	A	G	A	1.13639	1.03224	1.25106	0.00913945
16	68494715	rs4783640	T	C	T	0.871851	0.786426	0.966556	0.00914758
10	121335862	rs7914068	C	T	C	0.883299	0.804581	0.969719	0.00917096
2	2522406	rs10865530	G	A	G	0.906746	0.842363	0.97605	0.0091862
17	55225951	rs758018	A	C	A	0.691419	0.523763	0.91274	0.00920455
18	51388415	rs2509936	A	G	A	0.899393	0.83041	0.974107	0.00920613
17	13537330	rs3826371	A	G	A	0.9042	0.838203	0.975393	0.00920686
8	53610265	rs7463499	C	T	C	0.823037	0.710818	0.952972	0.00921341
3	67970180	rs1447765	T	G	T	1.16395	1.03825	1.30487	0.00922111
6	152166049	rs2635471	G	A	G	1.10212	1.02433	1.18582	0.00922462
19	39103556	rs8101954	G	A	G	1.10233	1.02438	1.18621	0.00922543
9	111824866	rs7046078	A	G	A	0.912233	0.851279	0.977551	0.00922917
18	63790344	rs1720840	T	C	T	0.834032	0.727504	0.956158	0.00924175
5	160484499	rs2961920	C	A	A	1.09545	1.02272	1.17335	0.00929886
14	74144568	rs7152352	A	G	A	0.905265	0.839842	0.975783	0.00930889
1	233334086	rs1294295	T	C	T	1.58703	1.12048	2.24783	0.00930961
3	59305937	rs7620087	T	C	T	0.890174	0.815437	0.971762	0.0093175
9	7780024	rs7023847	T	G	T	1.10468	1.02481	1.19076	0.00931829
3	28518060	rs13087540	T	C	T	0.906923	0.842531	0.976235	0.00932094
2	41910075	rs6734260	G	A	A	1.09677	1.02298	1.17587	0.00933693
9	133902224	rs2157835	G	T	G	1.23689	1.05367	1.45196	0.00934566
12	57460528	rs10783827	G	T	T	1.10732	1.02538	1.19581	0.00934759
4	133239219	rs28762378	G	A	A	0.908298	0.844744	0.976634	0.00935542
9	78700610	rs1757947	G	T	G	0.906766	0.842243	0.976232	0.00935831
1	242192334	rs316822	C	T	C	0.907873	0.84404	0.976534	0.00936786
7	12028069	rs2908735	T	C	C	1.09999	1.02368	1.182	0.00937809
11	100993636	rs488365	G	A	G	1.11939	1.02806	1.21884	0.00939628
5	75682029	rs193344	T	C	T	1.13732	1.03206	1.25331	0.00940937
2	65175744	rs2024438	G	T	G	0.838287	0.733778	0.957681	0.0094192
3	98185609	rs67479571	G	A	G	1.09776	1.02312	1.17785	0.00943019
10	2275634	rs1926040	A	G	A	1.17236	1.03973	1.32191	0.00943284
5	112506202	rs10478090	G	A	G	0.788756	0.659372	0.94353	0.00943644
6	158475744	rs2771425	A	G	G	0.912562	0.851643	0.97784	0.00944047
1	113497178	rs7552618	T	G	T	1.123	1.02878	1.22586	0.00947317
1	75884474	rs5745491	T	G	T	0.595203	0.402187	0.880849	0.00947778
6	31678906	rs3131376	A	G	A	1.45998	1.0968	1.94341	0.00951191
9	123520986	rs2772214	C	A	C	1.24417	1.05478	1.46755	0.00951346
20	53515390	rs915049	T	C	T	0.878311	0.796249	0.968831	0.00952287
2	108512406	rs2718765	C	T	C	1.51464	1.10662	2.07311	0.00952542
2	80006300	rs416523	A	G	A	0.788693	0.659114	0.943747	0.0095362
9	90911389	rs1614353	C	T	C	0.761659	0.619942	0.935774	0.00954386
9	68782831	rs2017	T	C	T	0.91333	0.852812	0.978142	0.00954834
4	152635706	rs4696142	A	G	A	1.16203	1.03727	1.30179	0.00955594
14	51906635	rs12147761	T	G	T	1.2193	1.04943	1.41668	0.00959261
3	149357843	rs1594328	G	A	G	0.892941	0.819609	0.972834	0.00960042
8	19774579	rs7010610	G	T	T	0.914755	0.855106	0.978565	0.00960378
21	17572000	rs2246741	G	A	G	0.841868	0.739039	0.959004	0.00960458
14	64428436	rs8019804	G	T	G	0.843939	0.7422	0.959624	0.00963196
6	5435041	rs9405267	G	A	G	1.14743	1.03396	1.27335	0.00963813
7	149617179	rs354052	C	T	C	1.13759	1.03176	1.25426	0.00966274
1	75456062	rs1936357	C	T	C	1.30385	1.06643	1.59412	0.0096777
6	116899484	rs339349	A	G	A	0.799478	0.674769	0.947237	0.00969769
9	90134720	rs10481711	T	G	T	1.13034	1.03012	1.2403	0.00969852
20	23788085	rs62207514	T	G	G	0.915506	0.856252	0.97886	0.00971494
7	52459834	rs2192001	C	T	C	0.879101	0.79726	0.969343	0.0097527
9	79176729	rs7863619	A	G	A	1.16925	1.0385	1.31646	0.00975549
6	22709252	rs9393329	A	G	A	0.891096	0.816468	0.972546	0.00977239
8	97017934	rs4734356	T	C	T	1.26743	1.05887	1.51707	0.00977955
4	57413316	rs7698821	T	C	T	1.09343	1.02179	1.17009	0.00978102
2	203782538	rs749933	A	G	G	0.914166	0.853996	0.978576	0.00978304
3	33401483	rs590497	T	C	C	1.09388	1.02189	1.17095	0.00978869
9	5737579	rs6476998	A	G	A	0.842569	0.739838	0.959564	0.00981872
5	142638859	rs1609763	T	G	G	0.914556	0.854597	0.978722	0.00983343
5	91113922	rs2367282	A	G	G	1.0946	1.022	1.17236	0.00983732
18	67345607	rs2168347	A	C	A	1.10472	1.02427	1.19148	0.00983744
3	166602762	rs491793	A	G	G	1.09597	1.02231	1.17493	0.00983958
14	45099073	rs7152024	T	C	T	1.12005	1.02766	1.22075	0.00985012
1	239136794	rs10754665	A	C	A	0.857267	0.762648	0.963624	0.0098531
8	13627525	rs7816852	T	C	T	1.11127	1.0257	1.20398	0.00986155
9	77273480	rs2050831	A	G	A	0.862793	0.771301	0.965137	0.00986829
8	26445475	rs4342608	A	G	A	0.859168	0.765592	0.964182	0.00988213
11	15055238	rs7947361	G	A	G	0.913627	0.853032	0.978527	0.00988279
16	7254870	rs4300660	G	A	A	0.903578	0.836584	0.975938	0.00988999
5	142931334	rs37185	C	T	C	0.910272	0.847516	0.977674	0.00989537
20	46277676	rs2425844	T	C	T	0.904557	0.838172	0.976201	0.00989925
1	117810753	rs1935833	G	A	G	1.09164	1.02126	1.16686	0.00991382
8	18245586	rs4451337	C	T	C	0.909673	0.846513	0.977544	0.00992113
3	189928862	rs710522	G	A	G	0.912035	0.850372	0.978169	0.00993841
14	68978401	rs1983700	C	T	C	1.1881	1.0421	1.35455	0.00998469
17	80345336	rs9674961	G	A	A	1.09522	1.02199	1.1737	0.00999281
12	97092861	rs6538775	A	G	A	0.913592	0.852886	0.978619	0.00999393
2	132950133	rs281583	G	A	G	1.10591	1.02436	1.19396	0.0100045
22	19588077	rs5993709	C	T	T	0.915933	0.8567	0.97926	0.0100421
3	127475874	rs1868239	C	T	C	1.14643	1.03314	1.27215	0.0100509
6	103660809	rs6929015	A	G	A	1.09518	1.02193	1.17368	0.0100534
1	225439807	rs4653638	A	G	A	1.14759	1.03338	1.27442	0.0100573
6	65738242	rs2636114	T	C	T	1.11169	1.02557	1.20503	0.0100581
13	53951820	rs1977891	G	A	G	1.11936	1.02723	1.21976	0.0100835
1	190564619	rs1327871	T	C	T	0.572601	0.374423	0.875671	0.0100961
16	59378300	rs1364209	T	C	T	0.906995	0.841985	0.977024	0.0100969
6	168416410	rs942544	T	C	T	1.09474	1.02178	1.17292	0.0101068
9	22628386	rs635827	G	A	G	0.903705	0.83658	0.976217	0.0101347
13	55039701	rs1998693	A	C	C	1.09665	1.02217	1.17655	0.0101398
20	12922448	rs636072	C	T	C	1.10482	1.02395	1.19206	0.010158
8	77094754	rs6473004	C	T	C	0.275407	0.102974	0.736586	0.0101974
5	90570037	rs625135	A	G	G	1.09375	1.02147	1.17114	0.0101983
4	88261366	rs7658173	T	C	T	0.369508	0.172872	0.78981	0.0102053
12	52740640	rs10747651	T	C	C	0.914	0.853379	0.978926	0.0102212
15	88836655	rs11630917	G	A	A	0.904022	0.83702	0.976388	0.0102244
15	71313114	rs1606888	A	G	A	1.13848	1.03119	1.25693	0.0102248
12	43269855	rs7970905	T	C	T	0.882138	0.801614	0.97075	0.0102341
3	59371398	rs4518077	G	A	A	0.904709	0.838114	0.976596	0.0102573
21	33461579	rs4817572	T	G	T	1.09338	1.02132	1.17052	0.0102735
5	74375271	rs10036596	G	A	G	1.10863	1.02466	1.19949	0.0102803
6	134944479	rs4646871	G	A	G	0.915634	0.85602	0.979399	0.0102882
2	176219673	rs78890185	C	T	T	0.910982	0.848364	0.978222	0.0102888
4	14158202	rs3930940	A	G	A	1.26264	1.0566	1.50885	0.0102953
6	165672757	rs9364808	C	T	C	1.36918	1.077	1.74063	0.0102971
6	49900666	rs780784	A	G	A	1.35009	1.07342	1.69807	0.010302
3	45075681	rs6773576	A	G	A	1.19125	1.04216	1.36168	0.0103113
1	216156942	rs627143	T	C	T	1.36865	1.0768	1.7396	0.010328
13	30120186	rs549744	G	T	G	0.868318	0.779476	0.967286	0.0103491
6	109778790	rs6568606	G	A	G	1.20544	1.04496	1.39057	0.0103666
1	68168461	rs2566757	T	G	T	0.770575	0.631343	0.940512	0.0103729
11	71939195	rs10736780	T	C	T	1.1249	1.02808	1.23083	0.0103756
7	49646263	rs4132252	G	A	G	0.870043	0.782181	0.967776	0.0103769
7	138899869	rs4732341	A	G	A	0.794785	0.666756	0.947398	0.0103794
8	23560609	rs1567668	A	G	G	0.913366	0.852194	0.978928	0.0104038
18	52145749	rs4597418	A	G	G	1.09462	1.02146	1.17303	0.0104239
11	34197009	rs2957497	A	G	G	0.916214	0.856871	0.979668	0.010431
11	132127836	rs7106072	G	A	A	1.09226	1.02093	1.16857	0.0104326
14	40063961	rs2899901	G	A	A	1.09293	1.02107	1.16983	0.0104368
5	52492345	rs4601005	A	G	A	0.889223	0.812795	0.972838	0.0104512
16	85468614	rs12447168	C	A	C	0.909858	0.846389	0.978088	0.0104523
20	15496641	rs2145013	G	T	G	1.10109	1.02283	1.18533	0.0104609
3	22858910	rs298419	G	A	G	1.12926	1.02889	1.23942	0.0104746
11	23920272	rs10742014	T	C	T	1.23018	1.0497	1.44167	0.0104899
13	109719556	rs9521488	T	C	T	1.09668	1.02182	1.17702	0.0105198
22	19952116	rs174691	A	G	A	1.09416	1.02125	1.17227	0.0105372
2	57451662	rs1401256	G	A	G	1.09343	1.02107	1.17091	0.0105565
8	141229111	rs7018178	T	C	T	0.872407	0.785742	0.968632	0.0105584
18	48386697	rs7243063	C	T	C	1.21281	1.04606	1.40614	0.0105697
4	65020542	rs12186163	T	C	T	1.0917	1.02068	1.16767	0.01058
21	26346664	rs2830179	C	T	C	0.891234	0.815904	0.973519	0.0106003
4	41198505	rs55945407	T	C	C	1.09551	1.02149	1.17489	0.0106005
2	10087134	rs12622575	A	G	A	1.0995	1.02234	1.18247	0.01061
17	80443420	rs9914610	G	A	A	0.907658	0.84264	0.977692	0.0106227
2	212896494	rs7578160	A	G	A	1.09445	1.02123	1.17291	0.0106324
18	68367919	rs4891673	G	A	G	0.915447	0.855446	0.979657	0.0106431
9	26050661	rs1571880	C	T	C	1.33303	1.06914	1.66206	0.0106501
6	119626225	rs1977147	T	C	T	1.1402	1.03099	1.26099	0.0106506
6	11834550	rs9296175	A	G	A	1.21157	1.04564	1.40383	0.0106549
4	48647676	rs1850520	A	C	A	1.22387	1.04807	1.42915	0.0106675
10	131620730	rs4243518	C	T	C	0.766629	0.625144	0.940136	0.0106804
5	147043866	rs1480157	A	C	A	1.10266	1.02295	1.18858	0.0106894
3	86120314	rs6789196	T	C	T	1.10419	1.02327	1.19151	0.0106956
13	90367895	rs2350559	A	G	A	1.09529	1.02134	1.17459	0.0107071
3	126674403	rs4679129	A	G	A	1.22158	1.0475	1.42458	0.0107214
2	174418008	rs7591124	T	C	T	0.893674	0.819738	0.974279	0.01073
20	35572587	rs224443	T	G	T	0.84838	0.747684	0.962638	0.0107524
1	15459700	rs4661627	A	G	A	0.902848	0.834641	0.976629	0.0107717
14	33944620	rs1629140	A	G	A	0.915674	0.855721	0.979827	0.0107783
4	183589249	rs4394039	T	C	T	1.13996	1.03076	1.26073	0.0107818
3	168860923	rs7636466	G	A	G	1.48173	1.09517	2.00473	0.010791
5	162878420	rs828715	A	G	G	1.09436	1.02105	1.17292	0.0108055
2	115160628	rs35809114	A	G	A	0.523073	0.317787	0.860972	0.0108124
1	204449070	rs2271427	T	C	T	1.09106	1.02033	1.1667	0.0108161
2	169764087	rs7558828	A	G	A	1.11102	1.02461	1.20472	0.0108197
12	25514715	rs1678559	A	C	A	0.85996	0.76574	0.965774	0.0108295
4	58516760	rs28627944	T	C	C	0.914764	0.854176	0.979649	0.0108338
1	112744158	rs4534375	T	C	T	1.12965	1.02852	1.24072	0.0108429
5	81578249	rs2972246	T	C	T	1.38854	1.07863	1.78749	0.0108529
17	73462105	rs9893938	G	T	G	2.94338	1.28243	6.75549	0.010871
2	100023970	rs12997584	T	C	C	0.910605	0.847277	0.978667	0.0108867
1	37398320	rs742544	T	C	C	0.909421	0.845323	0.97838	0.0108939
8	97150032	rs2436045	T	C	T	0.893045	0.818545	0.974325	0.0109211
11	14031785	rs2618521	A	G	A	1.09749	1.02161	1.17901	0.0109332
15	54145339	rs7181337	T	G	T	0.908099	0.843117	0.97809	0.0109351
5	160807893	rs7736913	G	A	G	0.612727	0.420092	0.893698	0.010973
11	101655745	rs1938857	G	A	A	0.913304	0.851655	0.979415	0.0109815
3	28632972	rs4539902	A	C	A	1.10464	1.02308	1.1927	0.01099
6	123401028	rs9401669	G	A	G	1.12878	1.02816	1.23924	0.0109927
2	13894697	rs2890456	C	T	C	1.11533	1.02533	1.21323	0.0109983
15	42005935	rs1704366	A	G	A	0.837603	0.730648	0.960215	0.0110086
19	57119588	rs1982912	G	A	G	1.17597	1.03772	1.33263	0.0110796
5	69085365	rs163191	C	T	C	0.914854	0.854129	0.979895	0.0110997
2	79966022	rs2916491	T	C	T	1.28296	1.0584	1.55517	0.0111468
19	17225364	rs4808604	A	G	A	2.20621	1.19739	4.06499	0.0111586
5	180200795	rs7708154	G	A	G	0.910204	0.846391	0.978827	0.0111805
1	200291211	rs7518301	G	T	G	0.669977	0.491663	0.912962	0.0111898
2	34044239	rs4671032	C	T	C	0.891203	0.815309	0.974163	0.0111998
11	79763320	rs2851429	A	G	A	1.58483	1.11032	2.26213	0.0112007
4	82868363	rs3775979	C	T	C	0.897889	0.826153	0.975853	0.0112345
1	186956504	rs7547623	T	G	T	1.62249	1.11606	2.3587	0.0112386
16	26541235	rs8056864	C	T	C	1.09836	1.02151	1.18099	0.0112398
4	151920240	rs361110	A	G	A	1.1957	1.04137	1.37292	0.0112512
8	26743877	rs1472346	C	T	C	0.912846	0.850678	0.979558	0.0112809
15	48406306	rs2013984	T	C	T	0.830034	0.718645	0.958689	0.0112836
3	61659354	rs7619155	G	A	G	0.876582	0.791658	0.970615	0.0112891
11	5981590	rs10742907	A	G	A	1.13504	1.02909	1.2519	0.0112929
8	137369704	rs6577784	C	A	C	1.09434	1.02061	1.1734	0.0113033
3	124792205	rs3772831	C	A	A	1.09439	1.0206	1.17351	0.0113206
22	22547532	rs3827305	G	A	G	1.2107	1.04408	1.4039	0.0113744
11	11373942	rs10047474	C	T	T	0.917275	0.857928	0.980727	0.0113987
3	59429475	rs11924829	G	T	G	1.12441	1.02677	1.23134	0.0114062
15	45656186	rs635205	G	A	G	0.900777	0.83072	0.976741	0.011417
7	41256065	rs6951537	G	A	G	1.09824	1.02132	1.18095	0.0114214
10	69603635	rs2616061	C	T	T	1.09045	1.01969	1.16613	0.0114242
8	100931390	rs3105452	A	G	A	1.09932	1.02153	1.18303	0.0114389
12	18658563	rs1823270	G	A	A	1.09563	1.02076	1.176	0.0114473
7	16332700	rs2389595	T	C	T	0.872154	0.7844	0.969725	0.0114667
10	97347136	rs4503460	C	T	C	1.16111	1.03414	1.30367	0.0114698
3	78589520	rs9830527	C	T	C	1.09166	1.01985	1.16853	0.0115373
1	203058409	rs12563163	T	C	C	0.916459	0.85647	0.98065	0.0115483
22	30981041	rs11703597	A	G	G	1.09069	1.01963	1.16672	0.0115581
18	77252638	rs1944546	G	A	G	0.90849	0.843268	0.978756	0.0115737
12	4659271	rs7958182	C	T	C	1.11156	1.02395	1.20668	0.011575
4	89505156	rs6824131	T	C	T	1.14685	1.03111	1.27558	0.0115921
4	39005146	rs10001298	C	T	C	1.10192	1.02193	1.18817	0.0115939
18	27182175	rs9951209	T	G	T	0.897513	0.825236	0.976121	0.011597
12	113646878	rs6489909	A	C	A	1.09833	1.02117	1.18132	0.0116109
12	68378458	rs4913441	T	C	T	0.738435	0.583484	0.934534	0.0116217
5	25786647	rs2928271	C	T	C	1.55804	1.10391	2.19898	0.0116586
14	57755777	rs9323317	T	C	C	1.0908	1.01956	1.16701	0.0116609
6	168387481	rs7775086	A	G	A	1.1069	1.02289	1.19781	0.0116737
3	45758379	rs2251347	C	T	C	1.17511	1.0366	1.33213	0.0116771
14	93572203	rs2402315	C	A	C	1.18135	1.03783	1.34473	0.0116775
11	105243995	rs10791749	G	A	G	0.842267	0.737061	0.962489	0.0116828
10	33787582	rs950717	C	T	C	1.09679	1.02079	1.17845	0.0116876
3	30530276	rs2171508	A	G	A	1.11679	1.0249	1.21693	0.0116912
7	78034169	rs2471614	G	T	G	1.43004	1.08286	1.88852	0.0117017
1	56291652	rs2793674	T	C	C	1.09276	1.01991	1.17081	0.0117388
8	27465886	rs2322583	A	C	A	1.09041	1.01942	1.16634	0.0117412
18	54621680	rs8096125	A	G	A	0.895153	0.821251	0.975706	0.0117556
22	47862481	rs761916	A	G	A	1.15447	1.03241	1.29097	0.011756
9	133520331	rs9802273	A	G	A	0.880774	0.797942	0.972204	0.0117562
12	3640063	rs7316666	A	C	A	0.741567	0.587648	0.9358	0.011769
13	108717498	rs195251	T	C	T	1.1922	1.03978	1.36696	0.011774
4	135446224	rs4864274	T	G	T	0.910305	0.846111	0.97937	0.01178
1	169878346	rs6682835	G	T	G	0.909016	0.843977	0.979068	0.0117865
7	88430018	rs62464738	A	G	G	1.09379	1.02007	1.17284	0.0117953
5	28732999	rs1593020	T	C	T	1.12694	1.02685	1.23679	0.0117964
13	107681001	rs7993795	C	T	C	1.15808	1.03305	1.29825	0.0118133
1	61824038	rs1286816	C	A	C	1.13791	1.02903	1.2583	0.0118139
7	155840787	rs288761	G	A	G	1.09598	1.02049	1.17705	0.0118353
19	8991181	rs8105276	G	A	A	1.09084	1.01943	1.16726	0.0118367
7	64758296	rs28854574	G	T	G	0.910639	0.846615	0.979505	0.0118455
14	104316414	rs4900619	A	G	A	1.09588	1.02045	1.17687	0.0118542
16	5013151	rs8046982	A	G	G	1.09469	1.0202	1.17462	0.011865
18	6928597	rs4797269	C	T	T	1.0938	1.01999	1.17294	0.0118914
21	32661998	rs1099465	T	C	T	1.09428	1.02009	1.17387	0.0118962
10	120243731	rs3981115	G	A	G	1.93117	1.15627	3.2254	0.0119104
9	71368977	rs10781015	T	G	T	0.913049	0.850547	0.980144	0.0119267
2	20092820	rs4666355	A	G	A	0.832237	0.721218	0.960346	0.011942
1	98689572	rs12125243	G	A	A	0.911462	0.847883	0.979808	0.0119751
22	19181103	rs2800973	T	C	T	1.18172	1.0374	1.34612	0.0119913
3	24809971	rs6550916	A	G	A	1.09216	1.01956	1.16993	0.0120068
6	25424028	rs12213948	G	A	A	0.917314	0.857573	0.981217	0.0120104
9	127331625	rs10819274	C	T	C	1.10492	1.02215	1.19439	0.0120243
13	100968998	rs2765303	G	T	G	1.14219	1.02959	1.2671	0.012052
7	21460210	rs4722033	G	A	G	1.15323	1.03173	1.28905	0.0120806
9	31530198	rs2481594	C	T	C	0.876137	0.790133	0.971501	0.0121265
22	33116120	rs137307	C	T	C	0.826102	0.711549	0.959095	0.0121301
12	16002687	rs3983662	T	C	C	0.912422	0.84936	0.980165	0.0121335
5	138372745	rs4835678	C	T	C	1.12885	1.02684	1.24099	0.0121422
1	80369400	rs1687812	G	A	G	0.866921	0.775371	0.969281	0.0121452
1	86249101	rs6576824	T	C	T	0.631437	0.440808	0.904503	0.0121643
12	19857975	rs2694980	A	G	A	1.09109	1.01921	1.16804	0.012169
20	45911539	rs394643	A	G	A	0.915037	0.853671	0.980814	0.0121785
9	131828135	rs2987382	T	C	T	1.17466	1.03574	1.3322	0.0121801
14	98362938	rs1459119	A	G	G	0.916923	0.856803	0.981261	0.0121865
17	36889544	rs883286	G	T	T	0.911817	0.848303	0.980087	0.0122115
9	4294807	rs4534176	G	T	G	1.24911	1.04959	1.48654	0.0122417
6	33833733	rs12055409	A	G	G	0.90871	0.843134	0.979387	0.0122454
3	13973225	rs1488378	G	A	G	0.908173	0.842234	0.979275	0.0122614
7	153209700	rs4357211	T	C	T	1.10307	1.02155	1.19109	0.0122697
13	81897736	rs7337123	A	G	A	0.822512	0.705869	0.95843	0.0122761
3	187554871	rs2042691	C	T	C	1.10966	1.02287	1.20382	0.0122785
21	16306866	rs238943	C	T	C	0.840169	0.733104	0.96287	0.0122799
7	149868400	rs3735334	T	C	C	0.914395	0.852528	0.980751	0.0122889
21	20321433	rs2826171	G	A	G	0.906586	0.839585	0.978934	0.0122979
3	192148783	rs9877666	G	A	G	0.601934	0.404526	0.895677	0.012304
5	60008705	rs2409679	A	G	A	1.15846	1.03243	1.29987	0.0123115
16	5391307	rs11862708	G	T	G	1.10131	1.02114	1.18777	0.0123359
14	100300327	rs10873515	G	A	G	0.900295	0.829184	0.977503	0.0123503
11	131185886	rs1793804	T	C	T	0.766536	0.622395	0.944058	0.0123628
22	20367930	rs362116	A	G	A	1.17644	1.0358	1.33618	0.0123664
8	94680162	rs2890826	A	G	A	1.11705	1.02422	1.21828	0.0123936
6	23802915	rs6904242	C	T	C	0.786236	0.651164	0.949327	0.0123957
15	96279987	rs8035571	C	T	C	1.32739	1.06315	1.65731	0.0123966
6	696699	rs9379032	T	G	T	0.819392	0.700951	0.957846	0.0123969
12	11515017	rs1210181	G	A	A	1.08877	1.01854	1.16384	0.0124168
16	83559095	rs4238695	T	G	T	1.24397	1.04829	1.47619	0.0124203
6	76601303	rs2446102	C	T	C	1.33776	1.06487	1.68057	0.0124207
3	134903455	rs1515360	A	G	A	1.17843	1.03607	1.34035	0.0124399
7	25884270	rs6954747	A	C	A	1.18219	1.03676	1.34802	0.0124536
1	152633131	rs7529535	A	C	A	0.900809	0.829938	0.977731	0.0124676
1	223490337	rs4295879	T	G	T	1.09058	1.01886	1.16735	0.0124828
7	142826801	rs77930944	A	G	A	1.27943	1.05448	1.55236	0.0124998
12	41653782	rs287009	A	C	A	0.730952	0.571578	0.934764	0.0125047
7	17464882	rs662356	A	G	A	1.09156	1.01903	1.16926	0.0125177
6	147500606	rs325113	A	C	A	1.11112	1.02292	1.20693	0.0125266
17	41080905	rs72625953	A	C	C	1.09195	1.01909	1.17001	0.0125384
10	117502466	rs758572	A	G	A	1.19417	1.03887	1.37268	0.0125461
16	84509355	rs193702	A	G	G	1.09395	1.01948	1.17385	0.0125461
1	203390112	rs10920627	A	G	G	0.910457	0.845808	0.980049	0.0125519
9	131340993	rs4740439	G	A	G	0.866788	0.774753	0.969755	0.0125528
20	19075087	rs1033815	G	A	G	4.69566	1.39334	15.8247	0.0125929
13	110600306	rs3956684	T	C	T	1.11922	1.02445	1.22276	0.0125943
1	66081459	rs2503228	A	G	A	1.35113	1.06664	1.71149	0.0126035
5	1100950	rs35832527	T	C	T	1.097	1.02004	1.17976	0.0126084
12	52263881	rs1902763	T	C	T	0.903633	0.834466	0.978532	0.0126266
11	13836896	rs7127844	A	G	A	1.09765	1.02014	1.18105	0.0126416
6	32199232	rs3132934	G	T	G	0.882107	0.799282	0.973514	0.0126475
5	114267979	rs4426906	A	G	A	0.811172	0.688112	0.95624	0.0126665
12	5267287	rs4415841	C	T	C	1.09445	1.01945	1.17497	0.012709
2	15091953	rs1178195	G	T	G	0.880353	0.796387	0.973172	0.012713
2	44944703	rs338074	A	G	A	1.51149	1.09216	2.09183	0.012713
8	48640797	rs1384219	A	G	A	1.13688	1.02775	1.25759	0.0127139
1	157891175	rs11264841	A	G	A	1.18735	1.03731	1.35908	0.012724
3	135236873	rs9865620	A	G	G	1.08815	1.01816	1.16295	0.0127558
13	74760177	rs9543768	T	G	T	1.20702	1.04089	1.39968	0.0127607
14	28603224	rs12589191	A	C	A	1.09399	1.01929	1.17417	0.0127968
4	125129756	rs10007337	T	C	T	0.871411	0.781908	0.971158	0.0128019
1	54172024	rs670877	A	G	A	0.904721	0.836129	0.97894	0.0128075
1	23874772	rs2502993	A	G	A	1.09417	1.01931	1.17453	0.0128188
22	25115503	rs5752063	T	G	T	1.09046	1.01857	1.16742	0.0128193
10	128300705	rs2244545	C	T	C	1.08989	1.01845	1.16635	0.012824
13	47626083	rs7982925	G	T	G	0.765946	0.620864	0.944932	0.0128243
19	40763861	rs2249835	G	A	G	0.909075	0.843317	0.97996	0.0128325
1	91747885	rs284169	G	A	A	0.9145	0.85233	0.981205	0.0128394
8	46786430	rs12546311	C	T	C	0.912493	0.848988	0.980749	0.0128414
11	1368981	rs6578295	C	A	A	1.09865	1.02014	1.18319	0.0128744
8	141157892	rs4961332	C	T	C	0.913713	0.850985	0.981064	0.01289
21	34577334	rs2256525	G	A	G	1.11429	1.02319	1.2135	0.0128955
17	61252638	rs3785861	C	T	C	1.11969	1.02421	1.22407	0.0129172
9	132640157	rs306534	T	C	T	1.09001	1.0184	1.16665	0.0129201
10	13954331	rs2446576	A	G	A	0.667783	0.485686	0.918153	0.0129332
4	120635597	rs12510046	A	G	A	1.13142	1.02643	1.24716	0.0129596
12	109159352	rs34268	A	G	A	0.840055	0.732157	0.963855	0.0129612
4	110367076	rs243970	A	C	A	1.08844	1.01804	1.1637	0.0129889
9	105054532	rs1532677	T	G	T	0.87645	0.789838	0.972559	0.0129889
13	111627363	rs7336349	C	T	C	0.910895	0.846207	0.980527	0.0130214
15	72211718	rs8023703	G	A	G	0.917851	0.857797	0.982109	0.0130338
12	23977224	rs4391897	T	G	T	0.805863	0.679606	0.955577	0.0130424
5	96542199	rs6556928	A	G	A	0.875616	0.788424	0.972451	0.0130667
22	42651530	rs5751321	G	T	G	1.13368	1.02674	1.25177	0.0130676
5	78310391	rs4572979	A	G	G	0.911479	0.847117	0.980731	0.0131113
8	94623824	rs2890805	T	C	T	1.09864	1.01991	1.18344	0.0131532
15	71757267	rs2245596	A	G	A	1.24757	1.0474	1.486	0.0131743
9	97713738	rs2808678	T	C	C	0.918778	0.859259	0.98242	0.0131753
2	205736992	rs849584	A	C	A	1.10908	1.02191	1.20369	0.0131771
15	34655224	rs6495700	G	T	G	1.10371	1.02087	1.19328	0.0131834
4	7435332	rs9997955	G	A	G	1.09256	1.0187	1.17177	0.0131853
3	177835954	rs9868594	A	G	A	0.91046	0.84536	0.980574	0.0132034
20	13876947	rs8115802	C	T	C	1.09108	1.01838	1.16896	0.01322
9	109859481	rs2769145	G	A	G	1.16453	1.03234	1.31365	0.0132223
1	58245555	rs676022	T	C	C	0.916168	0.854856	0.981878	0.013233
11	83920716	rs1483396	C	T	C	0.876729	0.790061	0.972905	0.0132415
8	96594120	rs2455050	G	A	G	0.69602	0.522519	0.927131	0.013243
2	241352963	rs14351	G	T	G	0.91521	0.853245	0.981675	0.0132484
11	98678982	rs2512846	A	G	A	0.910021	0.844586	0.980526	0.0132678
4	72512673	rs788933	A	G	A	1.09376	1.01887	1.17416	0.01327
1	77084746	rs199710	T	C	T	0.917199	0.856549	0.982144	0.013281
4	7576361	rs883506	A	G	A	1.13362	1.02648	1.25194	0.0132899
17	2522388	rs60359417	G	T	G	0.89607	0.821504	0.977405	0.013304
7	53084476	rs1153882	A	G	A	1.17177	1.03356	1.32845	0.0133055
6	33007604	rs453779	A	G	A	0.908575	0.842156	0.980232	0.0133058
13	93187800	rs400337	T	G	T	1.18079	1.03519	1.34688	0.0133233
7	1640191	rs10952209	T	C	T	1.21474	1.04131	1.41705	0.0133243
9	14997821	rs2140324	T	C	T	1.09467	1.01899	1.17597	0.0133389
11	72643820	rs236908	A	G	A	1.77989	1.12734	2.81015	0.0133464
22	49156793	rs5769966	G	A	A	1.09064	1.01819	1.16824	0.0133637
2	240613097	rs56762428	G	A	G	0.908539	0.842038	0.980292	0.0133909
2	60236014	rs359271	T	C	T	0.918032	0.857871	0.982412	0.013395
3	157776295	rs1685679	T	C	C	1.08985	1.018	1.16678	0.0134165
2	160928695	rs1710625	C	T	C	0.912632	0.848826	0.981235	0.0134276
6	33790288	rs7739273	G	A	G	1.22087	1.0422	1.43017	0.013436
16	9400110	rs12933414	C	T	T	0.913829	0.85081	0.981515	0.0134461
10	76140939	rs1898107	A	G	A	0.867203	0.774553	0.970936	0.0134513
7	32321007	rs1653876	T	C	C	1.08809	1.01759	1.16347	0.0135025
3	22081735	rs1852564	A	G	G	0.915077	0.852856	0.981837	0.0135056
11	27900526	rs7119334	C	A	C	1.09953	1.01978	1.18552	0.0135134
2	65712708	rs4671684	C	T	C	0.857405	0.758868	0.968736	0.0135149
5	73024576	rs194491	T	C	T	1.20492	1.03924	1.39702	0.0135155
3	53408091	rs542739	C	T	C	1.09399	1.01871	1.17483	0.0135271
21	18389479	rs2824796	T	C	T	0.848892	0.745388	0.966767	0.0135336
3	34864810	rs7632967	A	G	A	0.914941	0.85261	0.981828	0.0135345
4	172954710	rs13121679	A	G	A	1.08813	1.01758	1.16358	0.0135351
5	156643510	rs41073	T	C	T	1.37135	1.0673	1.76202	0.0135414
9	4182238	rs10814862	C	T	C	0.907536	0.840266	0.980191	0.0135434
8	106347018	rs12548769	A	G	G	1.09073	1.01807	1.16858	0.0135446
1	169984100	rs665774	T	C	T	0.771553	0.627985	0.947944	0.0135537
5	77280186	rs251426	A	G	A	1.14716	1.02865	1.27933	0.0135987
11	95745750	rs1255151	C	T	C	0.906786	0.838979	0.980073	0.0136042
2	2726886	rs11687595	T	C	T	1.10554	1.02084	1.19726	0.0136167
5	28078187	rs6450596	T	C	T	1.09038	1.01792	1.168	0.013651
20	63773580	rs4809340	G	A	G	1.14992	1.02908	1.28495	0.0136611
12	122071981	rs61952920	G	A	G	1.08827	1.01751	1.16395	0.0136675
6	157087467	rs6926659	T	C	T	1.13177	1.02572	1.24878	0.0136699
15	66730619	rs2414911	G	T	G	1.13021	1.02542	1.2457	0.0136774
3	24897566	rs7617593	T	G	T	1.16383	1.0316	1.31301	0.0136793
9	90273920	rs1777008	A	G	G	1.08878	1.01759	1.16496	0.013686
1	246687573	rs6426319	A	G	A	0.902756	0.832238	0.979249	0.013691
1	190609600	rs10737588	C	T	C	0.913651	0.850354	0.981661	0.0136917
1	209840378	rs689210	A	C	C	1.09224	1.01825	1.1716	0.0136931
8	4672485	rs2617018	T	G	T	0.914169	0.851204	0.981791	0.0137138
21	41376390	rs368549	A	C	A	2.80262	1.23495	6.36036	0.0137147
14	59238752	rs2578258	C	T	C	1.08962	1.01771	1.16662	0.0137447
12	73888286	rs6582198	T	C	T	1.13059	1.02541	1.24656	0.0137545
4	42478565	rs9997536	A	C	C	1.09162	1.01808	1.17047	0.0137623
5	169445670	rs13188544	G	A	G	1.10513	1.02063	1.19663	0.0137741
22	38352935	rs6001099	T	C	T	1.10245	1.02009	1.19146	0.0138114
4	60124193	rs7349655	C	A	C	2.50879	1.20634	5.21745	0.0138127
22	41419934	rs5758341	C	T	C	0.90428	0.834666	0.979701	0.0138276
7	24233611	rs16198	A	G	A	1.09366	1.01841	1.17447	0.0138328
15	61217261	rs7175393	T	C	T	1.53014	1.09053	2.14696	0.0138358
7	68852044	rs7805179	T	G	T	0.907608	0.840183	0.980444	0.0138384
11	99727378	rs6590291	T	C	T	0.913332	0.849715	0.981711	0.0138524
16	87722441	rs6540074	T	G	G	0.918028	0.857569	0.982751	0.0138729
9	106764941	rs4546718	G	T	G	0.702538	0.530297	0.930722	0.0138836
8	15180087	rs17121108	G	A	G	1.09229	1.01811	1.17187	0.0138837
2	143833889	rs2178735	C	T	C	0.916652	0.855232	0.982483	0.0139178
2	143925397	rs787154	C	T	C	1.25091	1.0464	1.4954	0.0139745
4	182119292	rs335084	G	A	G	1.50858	1.08681	2.09404	0.0139902
1	2367644	rs6704200	G	A	G	0.9108	0.845395	0.981264	0.013993
6	90834459	rs9345059	G	A	G	0.88203	0.797989	0.974923	0.0140074
4	125077768	rs11732137	C	T	T	1.08902	1.01739	1.1657	0.0140325
13	30360706	rs9578165	A	G	A	0.90228	0.831187	0.979453	0.0140587
5	167904318	rs7710122	T	C	T	1.09202	1.01793	1.17152	0.0140679
6	120826658	rs2050736	A	G	A	1.08923	1.01735	1.16618	0.014135
11	86880611	rs10751142	T	C	T	1.09933	1.01923	1.18572	0.0141497
10	36601591	rs4934825	A	C	A	0.915192	0.852639	0.982335	0.014153
15	68719806	rs12148095	A	G	A	1.13245	1.02533	1.25076	0.0141546
11	81587522	rs1945714	A	G	A	1.4093	1.07138	1.85378	0.0141697
3	148745735	rs275646	T	C	T	0.871446	0.780708	0.97273	0.0141744
13	20437968	rs6490577	T	C	T	0.881425	0.796855	0.974969	0.0141855
2	172789191	rs6725226	A	G	A	1.23942	1.04404	1.47138	0.0141936
3	184027875	rs939335	A	G	A	1.10489	1.02022	1.19659	0.0142003
14	30002110	rs225886	T	C	T	0.666338	0.481685	0.921777	0.0142098
1	54924996	rs615247	T	C	T	0.914922	0.852137	0.982333	0.0142302
14	39534409	rs12894906	A	G	A	0.916865	0.855393	0.982753	0.014234
17	40995716	rs7207786	T	G	T	0.917607	0.856617	0.982939	0.0142721
1	81609759	rs2389163	T	C	T	1.17162	1.0322	1.32987	0.0142753
7	153307572	rs650574	A	C	A	0.828358	0.712507	0.963045	0.014292
7	35577500	rs12540370	C	T	C	0.901789	0.830197	0.979555	0.0143081
1	224166958	rs2032003	A	C	A	1.08752	1.0169	1.16304	0.0143228
4	66748578	rs4860221	G	A	G	1.25414	1.0462	1.50341	0.014356
16	88008684	rs7404513	T	C	T	0.917764	0.85683	0.983032	0.0143567
3	14846039	rs1687324	A	G	A	0.718781	0.551798	0.936294	0.0143665
1	79866610	rs4650438	T	C	T	0.811433	0.686422	0.95921	0.0143723
2	190373648	rs1440990	A	G	A	0.707813	0.536716	0.933453	0.0143757
6	162646291	rs2803105	T	G	G	0.919097	0.859057	0.983333	0.0143811
10	24541021	rs10828668	A	G	G	0.909254	0.842545	0.981246	0.0144075
10	126311592	rs4962551	C	T	C	0.899591	0.826464	0.979188	0.0144385
12	2311211	rs4765914	T	C	T	1.22962	1.04193	1.45111	0.0144421
3	126959326	rs6777746	C	T	C	0.363133	0.161271	0.817668	0.0144436
3	86775512	rs4435642	G	A	G	1.24258	1.04407	1.47884	0.0144643
5	95873263	rs248336	G	A	G	1.19996	1.03685	1.38872	0.0144662
6	43840341	rs6926462	G	A	G	0.906782	0.838375	0.98077	0.0144792
16	75889191	rs7191341	T	C	T	1.92684	1.13896	3.25976	0.014485
15	71878421	rs6494974	C	A	C	2.64475	1.21279	5.76745	0.0144872
19	43796424	rs11083725	C	T	C	1.08903	1.01704	1.16611	0.0145168
1	38177748	rs10889393	C	T	C	0.757534	0.606275	0.946531	0.014545
1	37756449	rs640218	A	G	A	0.9193	0.859295	0.983495	0.0145566
2	6566327	rs1159673	C	A	C	0.911257	0.845794	0.981788	0.0145578
6	18112333	rs4469297	T	C	C	1.08702	1.01663	1.16229	0.0145749
12	130429204	rs4759681	A	G	A	1.41459	1.07092	1.86854	0.0145867
12	128083543	rs10744358	A	C	A	0.916492	0.854552	0.982921	0.0145872
1	157416322	rs6690419	T	G	T	0.892979	0.815429	0.977904	0.0146055
8	108672957	rs904174	G	A	G	1.09295	1.0177	1.17377	0.0146087
9	10251050	rs2498607	C	A	C	0.906285	0.837448	0.980779	0.0146264
3	3649260	rs13068985	C	T	C	0.813868	0.689837	0.9602	0.0146306
16	204551	rs1984990	A	G	G	1.0971	1.01843	1.18184	0.0146428
11	11623851	rs4910396	G	T	G	0.904568	0.834574	0.980432	0.0146509
8	107264645	rs2514884	C	T	C	0.89949	0.826134	0.97936	0.0146679
15	80484979	rs4480756	C	T	C	0.893898	0.816883	0.978173	0.0146855
6	25457989	rs1328262	C	T	C	1.08859	1.01684	1.16541	0.0146938
9	38267845	rs2810758	G	A	G	0.808561	0.681672	0.959069	0.0146955
9	22183782	rs866666	C	T	C	0.782491	0.642463	0.95304	0.0147656
5	102206080	rs598440	G	A	G	1.09085	1.01719	1.16985	0.0147789
2	122112709	rs1560603	T	C	T	2.6631	1.2116	5.8535	0.0147829
18	77184909	rs1026171	G	A	G	1.09686	1.01828	1.18151	0.0147873
6	90540522	rs157692	C	T	T	1.08761	1.01658	1.16361	0.0148003
8	12794596	rs7463440	T	G	G	1.08789	1.01663	1.16414	0.0148037
3	184125347	rs6806377	A	G	G	1.08733	1.01652	1.16306	0.0148083
3	1202333	rs4684802	T	G	T	1.18276	1.0334	1.35372	0.0148148
5	25768515	rs2972304	A	G	A	1.10571	1.01986	1.19879	0.0148179
4	185793854	rs7684943	A	G	G	0.915653	0.852993	0.982916	0.0148337
6	35226855	rs4713842	G	A	G	2.2524	1.17199	4.32878	0.0148468
5	56037395	rs6450363	A	G	A	1.15197	1.02803	1.29084	0.0148503
7	82039401	rs3779452	C	T	C	1.09599	1.01807	1.17987	0.014854
5	61653340	rs446275	G	A	G	0.893852	0.816664	0.978335	0.0148795
14	99893925	rs3783326	G	A	G	1.08764	1.01652	1.16373	0.0148952
8	65548508	rs7463329	A	G	A	1.22065	1.03961	1.43323	0.0149264
16	62101303	rs11865291	G	A	G	1.6716	1.10522	2.52824	0.0149375
11	65416344	rs666834	A	G	A	0.88909	0.808774	0.977382	0.0149514
10	130195825	rs10741211	C	T	C	1.11125	1.02073	1.2098	0.01496
12	119777265	rs203364	A	G	G	1.09014	1.01693	1.16863	0.0149632
5	132087782	rs31478	T	C	T	1.08923	1.01676	1.16686	0.0149642
13	49856993	rs9535379	T	C	T	0.797628	0.664815	0.956975	0.0149656
2	50689535	rs9309189	T	C	T	1.09235	1.01732	1.17293	0.0149809
20	20942886	rs4815009	G	A	G	0.855892	0.755037	0.970218	0.0149907
16	84240828	rs734710	T	C	C	0.912151	0.847015	0.982297	0.0149952
21	39863694	rs374162	C	T	C	0.879423	0.792929	0.975352	0.0149983
3	101302033	rs530566	A	G	A	0.894668	0.817912	0.978627	0.0150143
15	31723303	rs56080167	T	C	T	0.90638	0.837344	0.981107	0.0150221
4	57230892	rs6858414	T	C	T	1.23921	1.04248	1.47305	0.0150277
16	85959043	rs12444486	C	T	C	1.12079	1.02236	1.22868	0.0150313
2	57181325	rs987051	G	A	G	0.913029	0.848457	0.982514	0.0150431
8	110744710	rs4284025	A	C	A	1.27786	1.04868	1.55712	0.0150459
5	58151143	rs2910573	A	G	A	1.22781	1.04056	1.44874	0.0150604
2	205481686	rs4675529	T	C	T	0.844752	0.737282	0.967886	0.0150941
9	32171789	rs2819841	G	A	G	0.899763	0.826276	0.979784	0.0151087
14	94586222	rs2069962	A	C	C	1.09123	1.01702	1.17085	0.015113
13	86766308	rs9523309	C	A	A	1.08863	1.01655	1.16582	0.0151185
3	15529783	rs4684252	A	G	A	0.710294	0.538966	0.936085	0.0151426
1	200975712	rs296563	T	G	T	0.899709	0.826147	0.979821	0.0151668
7	81789770	rs969705	A	G	A	0.918746	0.857996	0.983798	0.0151846
19	46530434	rs10417062	G	A	A	0.912581	0.847613	0.982528	0.0151925
6	29519505	rs2523430	G	A	G	0.916638	0.854424	0.983382	0.0152128
7	15591129	rs11763320	A	G	A	0.916666	0.85447	0.98339	0.0152158
13	31606287	rs10162262	T	C	C	0.918848	0.858148	0.983842	0.0152195
2	26229341	rs2384361	T	C	T	0.897321	0.822143	0.979374	0.015232
13	103627768	rs7140105	G	A	G	1.11033	1.02032	1.20827	0.0152462
4	47540254	rs12651326	C	T	C	0.878237	0.790794	0.97535	0.0152501
3	39255332	rs938206	C	T	C	0.831923	0.71701	0.965253	0.0152553
9	106516282	rs7047957	C	T	C	0.913367	0.848884	0.982749	0.0152745
20	45407809	rs2247619	G	A	A	1.08928	1.01655	1.16722	0.0152828
11	9525936	rs4910473	A	G	A	1.10291	1.01896	1.19378	0.0153115
8	37587018	rs7386256	A	G	A	1.26924	1.04677	1.53899	0.0153139
5	62361747	rs247267	T	C	T	1.08839	1.01637	1.16551	0.0153167
1	14428264	rs6429660	G	A	A	0.920526	0.860918	0.984261	0.0153332
11	84727665	rs1789174	C	T	C	0.821826	0.701262	0.963118	0.0153411
11	8371221	rs4758063	A	G	A	1.08763	1.01621	1.16406	0.0153496
4	7852443	rs28485535	T	C	C	0.919048	0.858408	0.983971	0.0153525
13	74738068	rs9543765	G	A	G	1.10254	1.01886	1.1931	0.0153574
1	5233625	rs566114	T	G	G	0.920532	0.860912	0.984282	0.0153632
14	98237901	rs1257940	C	T	C	0.879932	0.793462	0.975824	0.0153641
7	50674421	rs2715128	A	G	A	0.689549	0.510498	0.9314	0.0153822
11	70557474	rs7945850	A	G	G	1.09118	1.01682	1.17097	0.0153838
13	30016671	rs705425	G	A	G	1.44004	1.0722	1.93408	0.0153853
16	79689029	rs4888045	T	C	T	1.17335	1.03102	1.33532	0.0153934
1	58008608	rs11207152	A	G	A	1.08906	1.01644	1.16687	0.0153955
5	39829182	rs6876969	T	G	G	1.09124	1.01681	1.1711	0.0154082
4	137807257	rs7438916	G	A	G	1.21141	1.03727	1.41478	0.0154295
14	85215673	rs1667521	G	T	G	1.09697	1.01781	1.18228	0.0154335
2	15068044	rs1178208	T	C	T	1.14294	1.02581	1.27343	0.0154358
11	104449486	rs6591081	C	T	C	1.09532	1.01752	1.17908	0.0154373
8	88195396	rs2139482	G	A	A	0.919201	0.858615	0.984061	0.0154429
12	94706859	rs4237891	C	T	T	1.09462	1.01739	1.17772	0.0154438
5	133744731	rs7701786	C	T	C	0.785724	0.646395	0.955086	0.0154611
12	114923952	rs9630280	T	C	C	0.917799	0.856223	0.983803	0.0154859
1	216513468	rs2809292	G	T	G	0.89093	0.811378	0.978282	0.0155166
3	26830944	rs17225665	A	G	G	0.915389	0.852133	0.98334	0.0155281
2	182335828	rs140587587	G	T	T	1.08635	1.01586	1.16174	0.015533
2	113216224	rs1077855	T	C	T	0.831007	0.715288	0.965446	0.0155379
7	25493959	rs6949497	A	G	A	0.91761	0.855873	0.9838	0.0155388
17	74848654	rs4789105	C	T	C	1.09954	1.01817	1.18741	0.0155672
9	3750483	rs7034518	C	T	C	0.47838	0.263208	0.869455	0.0155689
16	89855004	rs12596441	C	T	C	1.68983	1.10464	2.58502	0.0155713
11	5533813	rs10742709	A	G	G	0.919802	0.859554	0.984272	0.0155801
4	178047148	rs1711365	T	C	T	0.915696	0.852612	0.983447	0.0155945
21	39161238	rs1888489	T	C	C	0.918234	0.856894	0.983964	0.0155952
20	15674086	rs201212	T	C	T	1.10347	1.01883	1.19514	0.0156003
1	168890260	rs1590285	G	A	G	1.08569	1.01568	1.16053	0.0156313
12	47691980	rs4558241	T	C	C	0.919575	0.859128	0.984274	0.0156538
11	106416997	rs2458329	T	C	T	0.898084	0.823113	0.979883	0.015654
10	9090000	rs9424039	A	G	A	0.856715	0.755704	0.971228	0.0156893
6	39296850	rs2815066	G	A	A	1.08964	1.01634	1.16823	0.0156932
16	5613189	rs7196755	A	G	A	0.86602	0.770603	0.973251	0.0157268
5	80490586	rs249006	T	C	T	0.840422	0.729837	0.967763	0.0157274
22	48468005	rs1807602	T	C	T	1.09478	1.01721	1.17826	0.01573
12	105660347	rs4964151	T	C	T	0.791914	0.6553	0.957008	0.015744
16	89283770	rs2279349	G	A	G	1.09037	1.01642	1.1697	0.0157597
15	96758549	rs2715793	A	G	A	0.900732	0.827437	0.98052	0.0157675
1	66030456	rs2455032	T	G	G	1.08884	1.01614	1.16675	0.0157786
4	7601243	rs2107179	T	C	T	1.25634	1.04383	1.5121	0.0157899
6	163290705	rs7743517	C	A	C	1.18698	1.03272	1.36429	0.0158129
4	125142374	rs9994776	A	G	A	1.2653	1.04516	1.53182	0.0158294
9	96190985	rs10760803	C	T	C	1.30184	1.05072	1.61297	0.0158452
21	24064415	rs1910602	G	T	G	1.09019	1.01632	1.16942	0.0158528
12	113012268	rs10774682	C	T	C	1.08751	1.01585	1.16423	0.0158656
4	31841700	rs144931281	C	T	C	0.903373	0.83176	0.981151	0.0158855
18	12613013	rs11876191	T	C	T	0.885978	0.802952	0.977588	0.0158888
3	194817830	rs4234205	G	A	A	1.08532	1.01545	1.16	0.0158903
18	79835649	rs635436	A	G	A	0.918332	0.856877	0.984195	0.0159197
1	67395837	rs2229546	C	A	A	1.08754	1.01581	1.16433	0.0159221
16	8527003	rs58201903	C	T	T	1.0858	1.0155	1.16095	0.0159291
4	135582405	rs11944730	A	G	A	1.09569	1.01721	1.18023	0.0159555
11	1083155	rs41464048	C	T	C	0.918937	0.857879	0.984342	0.0159588
5	178066866	rs4246823	A	G	A	1.13781	1.02439	1.26379	0.0159611
9	4600273	rs10974642	C	T	T	1.09007	1.01622	1.16929	0.0159743
10	2440724	rs1492182	T	C	T	2.17573	1.15604	4.09483	0.0159798
2	77484254	rs7564840	T	C	C	0.909925	0.842667	0.982552	0.015986
5	124946875	rs6871433	T	C	T	0.695782	0.517984	0.934608	0.0159901
6	70921844	rs2504744	A	G	A	1.83352	1.11963	3.00258	0.0159963
10	9219723	rs2764394	T	C	C	0.920755	0.86093	0.984738	0.0160118
10	87509211	rs3842932	G	A	G	0.912476	0.846941	0.983083	0.016012
3	56559515	rs12486047	C	A	C	0.915811	0.852549	0.983769	0.016038
6	22318571	rs2143002	G	A	G	0.713172	0.541611	0.939077	0.0160543
3	14769870	rs294625	A	G	G	0.919713	0.859139	0.984558	0.0160547
6	100952122	rs678988	T	G	T	0.919066	0.858039	0.984434	0.0160628
14	53895955	rs4898816	A	G	A	1.0893	1.01602	1.16785	0.0160666
10	97907061	rs654624	C	T	C	0.838231	0.726051	0.967743	0.0160726
11	107042043	rs2465766	T	C	T	1.2025	1.03483	1.39734	0.0160908
12	30041953	rs2351020	A	G	A	0.916397	0.853503	0.983925	0.0160971
11	118344011	rs7947185	C	T	C	0.899824	0.825701	0.980602	0.016103
4	188885226	rs2122061	T	C	T	0.851122	0.746402	0.970534	0.016108
13	76019400	rs9544123	C	T	C	1.09572	1.01709	1.18042	0.0161228
5	92489144	rs6556831	G	T	G	0.731386	0.566859	0.943666	0.0161315
2	227799852	rs7605423	C	T	C	0.915287	0.851604	0.983732	0.0161396
1	75313173	rs1249670	C	T	C	1.12662	1.02233	1.24154	0.0161471
11	33084471	rs7394794	C	T	C	1.08995	1.01608	1.16918	0.0161487
17	78910003	rs6501265	A	C	C	0.913509	0.848594	0.98339	0.0161584
6	164263338	rs794106	C	T	C	1.09056	1.01618	1.17038	0.0161605
10	97099346	rs2636796	T	C	T	0.896089	0.819425	0.979926	0.0162012
7	124525945	rs10225755	G	A	G	1.09393	1.01672	1.17699	0.0162164
4	177389612	rs13108563	T	G	T	0.847497	0.740527	0.969918	0.0162325
2	220135258	rs12694510	T	C	T	0.827668	0.709364	0.965702	0.0162419
16	84190716	rs2875859	T	C	T	0.911641	0.84537	0.983106	0.0162866
3	11103561	rs6803934	T	C	T	1.09138	1.01623	1.17209	0.0162934
5	98177576	rs6869541	G	A	G	0.899025	0.824242	0.980593	0.0162943
7	90451583	rs2191492	G	A	A	0.918838	0.857521	0.98454	0.0163005
10	131453575	rs3125551	A	G	A	1.10739	1.01895	1.2035	0.0163047
18	2832896	rs6506035	T	C	T	0.796524	0.661555	0.959028	0.0163238
5	126348921	rs12517413	C	T	T	0.920538	0.860387	0.984894	0.0163305
8	63014032	rs4279586	T	C	T	0.686819	0.50545	0.933267	0.0163312
1	167743486	rs6658889	G	A	G	0.913456	0.848398	0.983502	0.0163388
16	88131126	rs8062950	T	C	T	1.10382	1.01832	1.19649	0.0163405
9	95661940	rs10820612	G	A	G	0.872332	0.780262	0.975266	0.0163929
1	210252164	rs660611	G	A	G	1.09721	1.01715	1.18358	0.0164031
11	81065353	rs10751041	C	A	C	1.10978	1.01927	1.20833	0.0164099
5	91932117	rs2114980	G	A	G	1.08575	1.01516	1.16124	0.0164487
8	17607720	rs2427712	T	C	T	0.860618	0.761278	0.972921	0.0164561
6	84934199	rs1322880	C	T	C	1.094	1.01656	1.17735	0.0164709
18	73586233	rs2156545	T	G	T	1.09308	1.01639	1.17556	0.0164891
15	53587346	rs4448885	T	C	T	1.09032	1.0159	1.17018	0.0165116
9	29230850	rs10757821	T	G	T	0.890771	0.810389	0.979126	0.0165235
6	33659300	rs2296342	G	A	G	1.08583	1.01513	1.16145	0.0165274
13	82008744	rs4884192	T	G	G	1.0863	1.0152	1.16239	0.0165465
1	58715925	rs999157	C	A	C	1.12997	1.02251	1.24872	0.0165505
4	125508116	rs1567050	C	T	C	1.08983	1.01577	1.16928	0.0165823
1	86699632	rs263445	T	C	T	1.08718	1.01532	1.16412	0.0165841
4	101530153	rs11936512	T	C	T	0.916657	0.853667	0.984296	0.0165869
7	103715849	rs10247439	A	G	A	1.10632	1.01854	1.20165	0.0165923
14	98967621	rs807343	G	A	G	0.874377	0.783426	0.975887	0.0165963
22	31394028	rs5997969	T	C	T	0.920258	0.859763	0.985009	0.0166056
10	52888599	rs6480977	C	T	C	0.914831	0.850565	0.983953	0.0166079
4	162566080	rs11100450	C	T	C	1.0858	1.01507	1.16146	0.0166118
7	113002978	rs2197954	G	A	G	1.31964	1.05166	1.65592	0.0166279
4	54172064	rs4864849	T	C	T	1.19855	1.03343	1.39006	0.0166294
21	17986913	rs197554	G	A	G	1.10554	1.01837	1.20016	0.0166457
13	110424593	rs4771678	T	C	T	0.892585	0.813296	0.979604	0.0166598
10	26408365	rs945294	G	T	G	1.20047	1.03368	1.39416	0.0166678
8	120388509	rs6992361	A	C	A	1.0938	1.01638	1.17711	0.0166698
11	121392286	rs297501	T	G	T	1.14828	1.02532	1.28599	0.0167223
10	127361006	rs10765002	G	T	T	0.920157	0.859527	0.985062	0.0167234
6	30397543	rs1264569	C	T	C	0.523455	0.308034	0.889528	0.016726
13	74601952	rs9543712	C	T	C	0.898228	0.822624	0.980779	0.0167299
1	219908197	rs7532352	C	T	C	1.10719	1.01858	1.20352	0.0167386
5	33805226	rs7737447	C	T	C	1.10741	1.0186	1.20395	0.0167505
8	54557985	rs11781152	G	A	G	1.08992	1.01568	1.16959	0.016752
7	1828403	rs7799782	A	G	A	1.08624	1.01505	1.16242	0.0167555
5	33598197	rs10075345	A	G	A	1.08801	1.01534	1.16588	0.0167765
8	25649772	rs2467722	T	C	T	0.844432	0.735145	0.969965	0.016793
11	127576937	rs356253	T	C	T	1.10174	1.01763	1.1928	0.0167937
11	18301377	rs2061163	A	C	A	0.6933	0.513442	0.936162	0.0168267
16	13177337	rs7194732	T	C	T	0.919962	0.859141	0.985088	0.0168267
1	247372781	rs10399672	C	T	C	0.909666	0.84172	0.983097	0.0168318
9	76661208	rs7039310	G	A	G	0.891548	0.811456	0.979545	0.0168349
11	21457421	rs4922825	T	G	T	1.33368	1.05319	1.68886	0.0168422
6	38501111	rs4316001	T	C	T	1.15963	1.02701	1.30937	0.0168446
3	80186158	rs9867579	T	C	T	0.913755	0.848607	0.983903	0.0168494
4	44580470	rs10938353	A	G	A	1.1203	1.02065	1.22969	0.0168534
1	156645402	rs2365716	G	A	G	1.24245	1.03981	1.48457	0.0168598
2	47594202	rs4953510	C	T	C	1.10809	1.01863	1.20542	0.0168661
15	33283723	rs6495009	G	T	T	0.920384	0.859835	0.985198	0.0168722
13	42976613	rs9567083	C	A	C	0.918898	0.857303	0.984919	0.0168838
2	49183808	rs12470268	T	G	T	1.09851	1.01702	1.18652	0.0168859
12	39963179	rs522271	T	C	T	0.863721	0.765908	0.974025	0.0168871
6	8110761	rs2039520	C	T	T	1.08736	1.01515	1.16472	0.0169101
11	126710921	rs4935985	C	A	C	0.6888	0.50727	0.935291	0.0169138
13	64621933	rs9540170	G	A	A	1.08656	1.015	1.16316	0.0169298
5	145267080	rs4422575	A	G	A	0.815707	0.690124	0.964142	0.0169376
2	219916718	rs2891836	A	C	C	1.08615	1.01491	1.16239	0.0169619
5	145101071	rs2190789	G	T	T	1.0852	1.01475	1.16055	0.0169637
3	82783092	rs9858734	A	C	A	0.865716	0.76906	0.974521	0.0169752
2	107405378	rs266237	T	C	T	1.18743	1.03122	1.3673	0.016981
19	27692029	rs1024698	T	C	T	1.23925	1.03913	1.47791	0.016983
7	92486548	rs1468867	C	T	C	0.913231	0.847628	0.983911	0.0170133
13	58906792	rs7323576	A	G	A	2.27923	1.15859	4.48382	0.0170165
10	30344911	rs2256847	T	C	T	1.99773	1.13158	3.52685	0.0170224
9	137342564	rs7852496	G	T	G	2.19298	1.15054	4.17993	0.0170302
15	56613785	rs10851610	C	T	C	0.879108	0.790807	0.97727	0.0170472
12	21937528	rs7316271	C	T	C	0.891762	0.811661	0.979767	0.0170493
18	51964220	rs1480925	C	T	C	1.12597	1.02138	1.24128	0.0170693
18	61577549	rs4941030	G	T	G	1.28226	1.0453	1.57293	0.0170792
5	95701399	rs153917	C	A	C	0.676491	0.490618	0.932782	0.0171027
3	189757765	rs7433868	T	C	T	0.822524	0.700484	0.965826	0.0171114
4	136521012	rs10461225	A	G	A	0.889342	0.807611	0.979346	0.0171125
9	98921463	rs7027300	G	A	G	0.895994	0.818631	0.980668	0.0171413
1	112800286	rs6694866	G	A	G	0.913383	0.84779	0.984052	0.0171825
13	95364889	rs2050708	G	A	G	1.09752	1.01665	1.18483	0.0171826
14	47816126	rs1956307	T	C	T	1.08956	1.01533	1.16922	0.017191
6	123567037	rs1998262	A	C	A	0.81539	0.689357	0.964467	0.0172054
6	47839159	rs578532	A	G	A	0.901069	0.827046	0.981717	0.0172256
10	81483213	rs10490927	C	A	C	0.835767	0.721057	0.968726	0.0172289
14	74274745	rs12887650	A	G	A	0.900067	0.825362	0.981533	0.0172379
5	168785946	rs891921	A	G	A	1.24546	1.03962	1.49207	0.0172441
9	119251749	rs539054	T	C	T	1.15166	1.0253	1.2936	0.0172522
1	57159976	rs10889028	A	G	A	1.08608	1.01471	1.16247	0.0172716
14	40401775	rs7150091	T	C	T	1.09585	1.01631	1.18161	0.0172741
4	60547993	rs1511129	T	G	T	0.747999	0.588964	0.949978	0.0172782
14	60995375	rs7153855	A	G	A	1.10373	1.0176	1.19715	0.0172792
4	168733883	rs9312359	C	T	C	0.41234	0.198806	0.855228	0.017307
18	52625575	rs1221867	C	T	C	0.861903	0.762623	0.974107	0.0173075
4	24966512	rs7691763	G	A	A	0.921728	0.86189	0.98572	0.0173151
7	23921481	rs10252043	A	G	A	1.15145	1.02519	1.29325	0.017322
8	4040329	rs2740911	G	A	G	0.876138	0.785732	0.976945	0.0173251
9	88963383	rs6559324	T	C	C	0.916884	0.853643	0.984811	0.0173258
4	119030492	rs7698598	A	G	A	1.14484	1.02414	1.27975	0.0173296
6	155835041	rs9371929	A	G	A	0.782016	0.638643	0.957577	0.0173373
17	51613894	rs7223878	T	C	C	1.08669	1.01477	1.16372	0.0173373
2	16522180	rs3934617	T	C	T	0.832778	0.716254	0.968258	0.0173412
10	52826028	rs3897992	T	G	T	0.728202	0.560758	0.945646	0.0173511
15	23477914	rs4778536	T	C	C	0.918719	0.856745	0.985175	0.0173534
9	28328040	rs1332286	G	A	G	0.921665	0.861761	0.985732	0.0173563
16	12708286	rs2865611	T	G	G	1.08961	1.01523	1.16943	0.0173615
3	112373291	rs7611568	T	C	T	0.782593	0.639467	0.957753	0.0173676
5	2792529	rs10069593	T	C	T	1.11564	1.01946	1.2209	0.0173676
7	114853219	rs6466499	A	G	A	0.911799	0.845004	0.983875	0.0173704
20	51106356	rs1204764	T	C	T	0.916504	0.852952	0.98479	0.017408
10	129543865	rs3858300	A	C	A	0.799954	0.665525	0.961537	0.0174157
4	24081382	rs1547957	T	C	T	0.91855	0.856423	0.985184	0.0174204
2	118752249	rs162742	A	G	A	1.11404	1.01915	1.21776	0.0174268
11	83852393	rs4944451	T	G	T	1.15616	1.0258	1.30309	0.0174377
8	9346915	rs9329185	A	G	A	1.09707	1.0164	1.18414	0.0174383
19	14319805	rs2420877	C	A	C	0.912185	0.845602	0.984011	0.0174649
4	136741626	rs1460156	G	A	G	1.15533	1.02564	1.30141	0.0174668
11	365862	rs6421981	G	A	G	1.20623	1.03342	1.40793	0.0174703
14	61888462	rs217685	A	G	A	0.781373	0.637529	0.957672	0.0174726
4	17354603	rs11733122	T	C	T	0.915121	0.850564	0.984577	0.0174832
7	123044335	rs1917670	A	G	A	0.912494	0.846109	0.984088	0.0174932
4	27938891	rs7684360	C	T	C	1.23674	1.03789	1.4737	0.0175141
1	70452206	rs546503	A	G	A	1.10541	1.01768	1.2007	0.0175369
22	43328627	rs3091358	A	G	A	1.08877	1.01498	1.16793	0.0175419
19	55921837	rs160104	A	C	A	0.913795	0.848276	0.984376	0.0175585
3	155487150	rs1125539	A	G	A	1.19403	1.03145	1.38224	0.0175676
15	33827822	rs2059954	A	C	A	1.2247	1.03601	1.44776	0.0175781
16	11745470	rs4780401	G	T	T	1.08988	1.01513	1.17014	0.0175806
3	2435221	rs2616572	C	T	C	1.29282	1.04581	1.59818	0.017597
18	14733472	rs28690792	T	C	T	1.08951	1.01505	1.16945	0.0176255
1	41610958	rs60743712	G	A	G	0.874443	0.782722	0.976911	0.0176377
17	627550	rs331013	A	G	A	1.08529	1.01434	1.1612	0.0176612
3	151361648	rs10755105	T	C	T	1.0863	1.0145	1.16319	0.0176675
1	9425395	rs7417409	T	C	T	0.896049	0.818367	0.981106	0.0176812
5	29564983	rs4403186	T	C	T	1.98665	1.1266	3.50325	0.0176988
7	34040742	rs4723349	A	G	G	0.921039	0.860515	0.98582	0.0177034
10	8276486	rs10795607	T	C	T	1.33821	1.05187	1.70248	0.0177087
1	232217642	rs6605046	C	T	C	1.32309	1.04976	1.66758	0.0177258
11	3433242	rs6578353	T	C	T	0.910129	0.841968	0.983807	0.0177397
13	72320195	rs1406441	A	G	A	1.09982	1.01663	1.18983	0.0177436
19	15647587	rs1290627	A	C	A	0.870293	0.775871	0.976207	0.0177438
3	113278707	rs775228	A	G	A	0.911798	0.844778	0.984134	0.0177618
16	84639929	rs1978492	C	A	C	1.1956	1.03143	1.38591	0.0177624
3	72097412	rs6549437	C	T	T	0.916687	0.853069	0.985049	0.0177662
4	1735535	rs3752749	T	C	T	0.866941	0.770396	0.975585	0.0177737
1	228941011	rs710824	A	G	G	0.921505	0.861274	0.985949	0.0177754
14	66121117	rs943416	A	G	A	0.918922	0.856866	0.985472	0.0177781
6	94222264	rs372288	C	T	C	0.914946	0.850105	0.984733	0.0177787
13	42360491	rs238274	G	A	G	0.8666	0.769835	0.975528	0.0177833
3	194076234	rs4687513	A	G	A	1.08813	1.01471	1.16686	0.0178015
1	68269750	rs10889755	A	G	A	0.863885	0.765407	0.975033	0.0178171
17	42683433	rs3760384	A	C	C	1.08436	1.01409	1.15949	0.0178184
4	184292114	rs2797506	A	G	A	1.25314	1.03974	1.51033	0.0178311
11	36196267	rs1405096	C	T	C	1.30706	1.04732	1.63123	0.0178382
10	85609031	rs2175200	C	T	T	1.08632	1.01439	1.16336	0.017857
19	18592267	rs3170474	T	C	T	1.08858	1.01474	1.16779	0.0178676
3	38307195	rs753330	T	G	G	0.916396	0.852513	0.985067	0.0178817
15	51687458	rs1456295	C	T	C	1.15964	1.02585	1.31088	0.0178859
6	30199517	rs9261558	C	T	C	0.790921	0.651343	0.96041	0.0178975
17	82880712	rs8067926	A	G	A	1.08893	1.01478	1.1685	0.0179001
1	175090841	rs4471221	T	C	C	0.919925	0.858511	0.985733	0.0179043
8	6905649	rs2981405	T	C	T	1.127	1.02078	1.24428	0.0179216
8	139875396	rs1870810	T	C	T	1.0921	1.01527	1.17474	0.0179238
11	106730775	rs2353440	G	T	G	0.405351	0.191911	0.856176	0.0179334
12	32447248	rs2728715	A	G	A	1.08662	1.01438	1.164	0.0179398
9	114174580	rs7855790	G	A	G	0.902838	0.829548	0.982603	0.0179691
4	38001144	rs7675683	T	C	T	1.14011	1.02276	1.27092	0.0179752
